# Supplementary material for: Post-polyploid chromosomal diploidization in plants is affected by clade divergence and constrained by shared genomic features
Source: Research Square preprint supplement (doi:10.21203/rs.3.rs-6440714/v1), 2025-05-12
Supplement: Supplementary file 1 [file f5118e6501e49dbc83fb9809.xlsx]

## Sheet: TableS1
Table S1. Sequencing reads used for assemblies and gene annotations of the Biscutella genomes
Species	Data type	Platform	Total read number	Total read bases (Gb)	Ave. read length (bp)	Sequence depth (folds)
B. auriculata	Short reads	Illumina	332056153	49.8	150	72.6
(AURI; n = 8)	Long reads	Nanopore	6483441	36.4	20770	53.1
	Hi-C	Illumina	251741221	37.7	150	55
	Iso-seq	PacBio	233687	30.5	130470	44.5
B. didyma	Short reads	Illumina	340090510	51	150	52
(DIDY; n = 8)	Long reads	Nanopore	2777771	37.8	12560	38.6
	Hi-C	Illumina	219965721	33	150	33.7
	Iso-seq	PacBio	277019	36.3	130966	37
B. baetica	Short reads	Illumina	343659315	51.6	150	47.9
(BAET; n = 8)	Long reads	Nanopore	4282343	44.9	10485	41.7
	Hi-C	Illumina	162209006	24.3	150	22.5
	Iso-seq	PacBio	141005	17.2	122050	16
	RNA-seq*	Illumina	13404192	3.5	260	3.2
B. lyrata	Short reads	Illumina	366593377	55	150	67.9
(LYRA; n = 6)	Long reads	Nanopore	2144554	31.3	16670	38.6
	Omni-C	Illumina	746068788	111.9	150	138.1
	HiFi	PacBio	1264846	22.4	17738	27.7
	Iso-seq	PacBio	287681	37.5	130422	46.3
	RNA-seq*	Illumina	11810482	2.9	245	3.6
B. austriaca	Short reads**	Illumina	452383566	226	150	226
(AUST; n = 9)	Long reads	Nanopore	2098027	37.34	17.797	37.3
	Hi-C**	Illumina	244522253	73.4	150	73.4
	RNA-seq**	Illumina	773909687	116.09	150	116.1
B. varia	Short reads	Illumina	138983160	41.97	150	50.4
(VARI; n = 9)	Long reads	Nanopore	3882253	77.55	21104	93.2
	Hi-C	Illumina	149597380	44.88	150	53.9
	Iso-seq	PacBio	1601275	2.37	1482	2.9
B. prealpina	Short reads	Illumina	253502250	76.26	150	88.1
(PREA; n = 9)	Long reads	Nanopore	4596984	53.93	11731	62.3
	Hi-C	Illumina	151002832	45.3	150	52.3
	Iso-seq	PacBio	1554462	2.26	1451	2.6
B. frutescens	Short reads	Illumina	138587777	41.85	150	58.9
(FRUT; n = 9)	Long reads	Nanopore	4589111	92.61	21463	130.4
	Hi-C	Illumina	274045464	82.21	150	115.8
	Iso-seq	PacBio	882572	1.33	1503	1.8
*The data were downloaded from Guo et al., 2021.
**The data were downloaded from Beringer et al., 2024.

## Sheet: TableS2
Table S2. Statistics of the eight Biscutella genome assemblies
Features	VARI	AUST	PREA	FRUT	AURI	DIDY	BAET	LYRA
Estimated GS (Flow cytometry; Mb)	814	904	916	936	686	980	1100	806
Estimated GS (Kmer; Mb)	896	654	948	770	676	799	1228	685
Estimated heterozygosity (%)	1.74	1.81	1.37	1.11	2.06	0.08	2.33	1.77
Number of contigs	754	1764	1880	466	1298	382	2264	119
Largest contig (bp)	20350569	7465730	21550724	38972287	4149463	30283511	7541587	75068647
Contig N50 (bp)	3495923	1245183	980318	6984031	746349	6314568	877340	22882720
Number of scaffolds	267	591	491	101	133	54	161	9
Largest scaffolds (bp)	87591500	94745900	99230200	88879100	76103313	109386858	159209505	143166165
Scaffold N50 (bp)	73742100	78444700	82077800	73938800	59682970	127881000	146191849	113106174
Total length (bp)	832241633	1001128010	866272356	710221352	515766597	861370550	1169464239	765632381
GC (%)	37.55	37.93	38.08	37.47	35.63	36.64	36.44	37.83
BUSCO (%)	98.7	99.1	92	98.9	98.4	96.1	95.6	97.5

## Sheet: TableS3
Table S3. The BUSCO scores of eight Biscutella genomes using the genome and protein models
Model	Species	Single-copy	Duplicated	Fragmented	Missing	Complete
Genome	VARI	0.766	0.221	0.002	0.011	0.987
	AUST	0.703	0.288	0.002	0.007	0.991
	PREA	0.699	0.221	0.009	0.071	0.92
	FRUT	0.844	0.145	0.004	0.007	0.989
	AURI	0.811	0.173	0.005	0.011	0.984
	DIDY	0.884	0.077	0.006	0.033	0.961
	BAET	0.651	0.305	0.006	0.038	0.956
	LYRA	0.868	0.107	0.007	0.018	0.975
Protein	VARI	0.734	0.205	0.016	0.045	0.939
	AUST	0.691	0.249	0.027	0.033	0.94
	PREA	0.688	0.205	0.022	0.085	0.893
	FRUT	0.809	0.143	0.012	0.036	0.952
	AURI	0.788	0.152	0.018	0.042	0.94
	DIDY	0.855	0.076	0.02	0.049	0.931
	BAET	0.634	0.291	0.034	0.041	0.925
	LYRA	0.83	0.102	0.017	0.051	0.932

## Sheet: TableS4
Table S4. Statistics of various features related to genes based on annotated gene models
Features	VARI	AUST	PREA	FRUT	AURI	DIDY	BAET	LYRA
Gene number	42812	50236	48401	36841	32459	32292	49602	33392
Gene length (bp)	101583970	126755721	104561225	84632382	72230611	71843432	102991882	70634560
Ave. gene length (bp)	2201	2523	2160	2297	2225	2225	2076	2115
CDS number	209856	245613	229908	188137	177929	169419	237100	167907
CDS length (bp)	47368041	51565980	50410755	41949129	41039443	39370927	56185769	40001723
Ave. CDS length per gene	336.74	326.263	313.293	323.746	385.503	384.338	380.725	395.125
Ave. exon number per gene	5.01	5.42	4.85	5.26	5.48	5.25	4.78	5.03
Intron length	50904029	84508529	47803494	46785159	54609241	53985770	75847484	51894703
Ave. intron length per gene	284.59	327.549	273.961	309.128	462.143	481.187	473.752	483.64

## Sheet: TableS5
Table S5. Syntenic fragments and pericentromeric regions identified in Biscutella
			Peri-cen start boundary
		Peri-cen end boundary
Species	Index	Start genes	End genes	Chr	Start genes in Ath	End genes in Ath	GBs	Subgenome
VARI	frag1	VARIA_0032027-RA	VARIA_0033668-RA	VARI_chr_1	AT4G16310.4.Araport11.447	AT4G40070.1.Araport11.447	U	MF
VARI	frag2	VARIA_0033667-RA	VARIA_0033992-RA	VARI_chr_1	AT4G14000.1.Araport11.447	AT4G16220.1.Araport11.447	T	MF
VARI	frag3	VARIA_0034143-RA	VARIA_0034426-RA	VARI_chr_1	AT5G37740.2.Araport11.447	AT5G39990.1.Araport11.447	S	MF
VARI	frag4	VARIA_0034425-RA	VARIA_0034874-RA	VARI_chr_1	AT5G42150.1.Araport11.447	AT5G47800.2.Araport11.447	V	MF
VARI	frag5	VARIA_0034873-RA	VARIA_0035334-RA	VARI_chr_1	AT5G60810.1.Araport11.447	AT5G67630.1.Araport11.447	X	MF
VARI	frag6	VARIA_0035336-RA	VARIA_0035608-RA	VARI_chr_1	AT5G23010.2.Araport11.447	AT5G30510.1.Araport11.447	Q	MF
VARI	frag7	VARIA_0035609-RA	VARIA_0035712-RA	VARI_chr_1	AT5G47820.1.Araport11.447	AT5G49580.3.Araport11.447	Wa	MF
VARI	frag8	VARIA_0016216-RA	VARIA_0016821-RA	VARI_chr_2	AT2G15042.1.Araport11.447	AT2G20900.1.Araport11.447	H	MF
VARI	frag9	VARIA_0016975-RA	VARIA_0017441-RA	VARI_chr_2	AT5G34850.1.Araport11.447	AT5G40320.1.Araport11.447	S	LF
VARI	frag10	VARIA_0017443-RA	VARIA_0017985-RA	VARI_chr_2	AT5G42140.1.Araport11.447	AT5G47800.2.Araport11.447	V	LF
VARI	frag11	VARIA_0018152-RA	VARIA_0018226-RA	VARI_chr_2	AT4G15080.1.Araport11.447	AT4G16190.1.Araport11.447	T	LF
VARI	frag12	VARIA_0018227-RA	VARIA_0020279-RA	VARI_chr_2	AT4G16250.1.Araport11.447	AT4G40090.1.Araport11.447	U	LF
VARI	frag13	VARIA_0035892-RA	VARIA_0036318-RA	VARI_chr_3	AT2G21160.1.Araport11.447	AT2G25070.1.Araport11.447	I #2	MF
VARI	frag14	VARIA_0036656-RA	VARIA_0036873-RA	VARI_chr_3	AT2G26840.2.Araport11.447	AT2G28590.1.Araport11.447	I #1	MF
VARI	frag15	VARIA_0036869-RA	VARIA_0037333-RA	VARI_chr_3	AT1G60060.1.Araport11.447	AT1G64650.1.Araport11.447	D	LF
VARI	frag16	VARIA_0037341-RA	VARIA_0038719-RA	VARI_chr_3	AT1G64970.1.Araport11.447	AT1G80950.1.Araport11.447	E	LF
VARI	frag17	VARIA_0038722-RB	VARIA_0039141-RA	VARI_chr_3	AT2G20920.1.Araport11.447	AT2G27190.1.Araport11.447	I #1	LF
VARI	frag18	VARIA_0039143-RA	VARIA_0039384-RA	VARI_chr_3	AT3G25540.1.Araport11.447	AT3G32940.1.Araport11.447	KL #2	LF
VARI	frag19	VARIA_0039385-RA	VARIA_0039475-RA	VARI_chr_3	AT2G02030.1.Araport11.447	AT2G04038.1.Araport11.447	KL #1	LF
VARI	frag20	VARIA_0006480-RA	VARIA_0006617-RA	VARI_chr_4	AT5G47860.1.Araport11.447	AT5G49620.2.Araport11.447	Wa	LF
VARI	frag21	VARIA_0006618-RA	VARIA_0007088-RA	VARI_chr_4	AT5G23010.2.Araport11.447	AT5G30490.1.Araport11.447	Q	LF
VARI	frag22	VARIA_0007077-RA	VARIA_0007512-RB	VARI_chr_4	AT5G60830.1.Araport11.447	AT5G64810.1.Araport11.447	X	LF
VARI	frag23	VARIA_0008022-RA	VARIA_0008505-RA	VARI_chr_4	AT3G19710.1.Araport11.447	AT3G25520.3.Araport11.447	F #1	MF
VARI	frag24	VARIA_0008510-RA	VARIA_0009318-RA	VARI_chr_4	AT3G52660.3.Araport11.447	AT3G63530.2.Araport11.447	MN #1	LF
VARI	frag25	VARIA_0009332-RA	VARIA_0010377-RA	VARI_chr_4	AT1G19850.1.Araport11.447	AT1G36990.1.Araport11.447	B	LF
VARI	frag26	VARIA_0010369-RA	VARIA_0011992-RA	VARI_chr_4	AT1G01030.1.Araport11.447	AT1G19840.1.Araport11.447	A	LF
VARI	frag27	VARIA_0020283-RA	VARIA_0020654-RA	VARI_chr_5	AT4G00060.3.Araport11.447	AT4G05450.1.Araport11.447	O	LF
VARI	frag28	VARIA_0020748-RA	VARIA_0021222-RA	VARI_chr_5	AT4G08280.2.Araport11.447	AT4G12600.2.Araport11.447	P	LF
VARI	frag29	VARIA_0021369-RA	VARIA_0022502-RA	VARI_chr_5	AT5G50175.1.Araport11.447	AT5G60800.2.Araport11.447	Wb	LF
VARI	frag30	VARIA_0022503-RA	VARIA_0024204-RA	VARI_chr_5	AT5G01070.1.Araport11.447	AT5G22950.1.Araport11.447	R	LF
VARI	frag31	VARIA_0000001-RA	VARIA_0001196-RA	VARI_chr_6	AT2G31070.1.Araport11.447	AT2G47980.1.Araport11.447	J	MF
VARI	frag32	VARIA_0001201-RA	VARIA_0001539-RA	VARI_chr_6	AT2G28340.1.Araport11.447	AT2G31020.1.Araport11.447	I #3	MF
VARI	frag33	VARIA_0001676-RA	VARIA_0002221-RA	VARI_chr_6	AT2G27060.1.Araport11.447	AT2G31010.2.Araport11.447	I #2	LF
VARI	frag34	VARIA_0002224-RA	VARIA_0003882-RB	VARI_chr_6	AT2G31060.3.Araport11.447	AT2G48150.1.Araport11.447	J	LF
VARI	frag35	VARIA_0003884-RA	VARIA_0004204-RA	VARI_chr_6	AT4G00026.1.Araport11.447	AT4G05420.1.Araport11.447	O	MF
VARI	frag36	VARIA_0004193-RA	VARIA_0004440-RA	VARI_chr_6	AT4G07390.2.Araport11.447	AT4G12620.1.Araport11.447	P	MF
VARI	frag37	VARIA_0004447-RA	VARIA_0005196-RA	VARI_chr_6	AT5G49630.1.Araport11.447	AT5G60800.2.Araport11.447	Wb	MF
VARI	frag38	VARIA_0005132-RA	VARIA_0006251-RA	VARI_chr_6	AT5G01010.2.Araport11.447	AT5G23000.1.Araport11.447	R	MF
VARI	frag39	VARIA_0024216-RA	VARIA_0025979-RA	VARI_chr_7	AT1G43730.1.Araport11.447	AT1G55270.1.Araport11.447	C	MF
VARI	frag40	VARIA_0024406-RA	VARIA_0025275-RA	VARI_chr_7	AT1G65220.1.Araport11.447	AT1G80950.1.Araport11.447	E	MF
VARI	frag41	VARIA_0025288-RA	VARIA_0025749-RA	VARI_chr_7	AT1G56280.2.Araport11.447	AT1G64670.2.Araport11.447	D	MF
VARI	frag42	VARIA_0026107-RA	VARIA_0027139-RA	VARI_chr_7	AT1G19860.2.Araport11.447	AT1G34430.1.Araport11.447	B	MF
VARI	frag43	VARIA_0027140-RA	VARIA_0028112-RA	VARI_chr_7	AT1G01020.1.Araport11.447	AT1G19835.4.Araport11.447	A	MF
VARI	frag44	VARIA_0028113-RA	VARIA_0028501-RA	VARI_chr_8	AT2G01060.1.Araport11.447	AT2G04038.1.Araport11.447	KL #1	MF
VARI	frag45	VARIA_0028502-RA	VARIA_0028930-RA	VARI_chr_8	AT3G25540.1.Araport11.447	AT3G30390.2.Araport11.447	KL #2	MF
VARI	frag46	VARIA_0028931-RA	VARIA_0029587-RA	VARI_chr_8	AT2G13600.1.Araport11.447	AT2G20890.1.Araport11.447	H	LF
VARI	frag47	VARIA_0029685-RA	VARIA_0029718-RA	VARI_chr_8	AT2G05590.2.Araport11.447	AT2G06010.1.Araport11.447	G	LF
VARI	frag48	VARIA_0029838-RA	VARIA_0032026-RA	VARI_chr_8	AT3G01040.2.Araport11.447	AT3G25520.3.Araport11.447	F	LF
VARI	frag49	VARIA_0011997-RA	VARIA_0013343-RA	VARI_chr_9	AT3G01015.1.Araport11.447	AT3G19710.1.Araport11.447	F #2	MF
VARI	frag50	VARIA_0013344-RA	VARIA_0014017-RA	VARI_chr_9	AT3G45190.1.Araport11.447	AT3G52630.1.Araport11.447	MN #2	LF
VARI	frag51	VARIA_0014071-RA	VARIA_0014960-RA	VARI_chr_9	AT1G43560.1.Araport11.447	AT1G56190.1.Araport11.447	C	LF
VARI	frag52	VARIA_0014973-RA	VARIA_0016208-RA	VARI_chr_9	AT3G42180.1.Araport11.447	AT3G63460.1.Araport11.447	MN	MF
AUST	frag1	AUSTR_0036411-RA	AUSTR_0038071-RA	AUST_chr_1	AT4G16260.1.Araport11.447	AT4G40070.1.Araport11.447	U	MF
AUST	frag2	AUSTR_0038073-RA	AUSTR_0038248-RA	AUST_chr_1	AT4G14080.1.Araport11.447	AT4G16220.1.Araport11.447	T	MF
AUST	frag3	AUSTR_0038718-RA	AUSTR_0038975-RA	AUST_chr_1	AT5G37680.1.Araport11.447	AT5G39970.1.Araport11.447	S	MF
AUST	frag4	AUSTR_0038979-RA	AUSTR_0039553-RA	AUST_chr_1	AT5G42130.1.Araport11.447	AT5G47800.2.Araport11.447	V	MF
AUST	frag5	AUSTR_0040037-RA	AUSTR_0040386-RA	AUST_chr_1	AT5G23010.2.Araport11.447	AT5G30510.1.Araport11.447	Q	MF
AUST	frag6	AUSTR_0040393-RA	AUSTR_0040516-RA	AUST_chr_1	AT5G47820.1.Araport11.447	AT5G49580.3.Araport11.447	Wa	MF
AUST	frag7	AUSTR_0039550-RA	AUSTR_0040617-RA	AUST_chr_1	AT5G60810.1.Araport11.447	AT5G67630.1.Araport11.447	X	MF
AUST	frag8	AUSTR_0027800-RA	AUSTR_0028612-RA	AUST_chr_2	AT2G15290.1.Araport11.447	AT2G20495.4.Araport11.447	H	MF
AUST	frag9	AUSTR_0028961-RA	AUSTR_0029192-RA	AUST_chr_2	AT5G37020.1.Araport11.447	AT5G40320.1.Araport11.447	S	LF
AUST	frag10	AUSTR_0029204-RA	AUSTR_0029940-RB	AUST_chr_2	AT5G42140.1.Araport11.447	AT5G47800.2.Araport11.447	V	LF
AUST	frag11	AUSTR_0030114-RA	AUSTR_0030199-RA	AUST_chr_2	AT4G15080.1.Araport11.447	AT4G16210.1.Araport11.447	T	LF
AUST	frag12	AUSTR_0030200-RA	AUSTR_0032160-RA	AUST_chr_2	AT4G16250.1.Araport11.447	AT4G40090.1.Araport11.447	U	LF
AUST	frag13	AUSTR_0040764-RA	AUSTR_0041279-RA	AUST_chr_3	AT2G21160.1.Araport11.447	AT2G24840.1.Araport11.447	I #2	MF
AUST	frag14	AUSTR_0041708-RA	AUSTR_0041926-RA	AUST_chr_3	AT2G26940.1.Araport11.447	AT2G28590.1.Araport11.447	I #1	MF
AUST	frag15	AUSTR_0041921-RA	AUSTR_0042465-RA	AUST_chr_3	AT1G60140.5.Araport11.447	AT1G64620.1.Araport11.447	D	LF
AUST	frag16	AUSTR_0042477-RA	AUSTR_0043869-RA	AUST_chr_3	AT1G64970.1.Araport11.447	AT1G80830.1.Araport11.447	E	LF
AUST	frag17	AUSTR_0043872-RA	AUSTR_0044295-RA	AUST_chr_3	AT2G20920.1.Araport11.447	AT2G27190.1.Araport11.447	I #1	LF
AUST	frag18	AUSTR_0044297-RA	AUSTR_0044568-RA	AUST_chr_3	AT3G25540.1.Araport11.447	AT3G32940.1.Araport11.447	KL #2	LF
AUST	frag19	AUSTR_0044569-RA	AUSTR_0044690-RA	AUST_chr_3	AT2G01100.2.Araport11.447	AT2G04038.1.Araport11.447	KL #1	LF
AUST	frag20	AUSTR_0007366-RA	AUSTR_0007524-RA	AUST_chr_4	AT5G47860.1.Araport11.447	AT5G49620.2.Araport11.447	Wa	LF
AUST	frag21	AUSTR_0007527-RA	AUSTR_0008103-RA	AUST_chr_4	AT5G23010.2.Araport11.447	AT5G30490.1.Araport11.447	Q	LF
AUST	frag22	AUSTR_0008114-RA	AUSTR_0008548-RA	AUST_chr_4	AT5G60830.1.Araport11.447	AT5G64667.1.Araport11.447	X	LF
AUST	frag23	AUSTR_0008961-RA	AUSTR_0009029-RA	AUST_chr_4	AT2G05230.1.Araport11.447	AT2G07040.1.Araport11.447	G	MF
AUST	frag24	AUSTR_0009124-RA	AUSTR_0009642-RA	AUST_chr_4	AT3G19710.1.Araport11.447	AT3G25420.1.Araport11.447	F #1	MF
AUST	frag25	AUSTR_0009647-RA	AUSTR_0010569-RA	AUST_chr_4	AT3G52660.3.Araport11.447	AT3G63530.2.Araport11.447	MN #1	LF
AUST	frag26	AUSTR_0010564-RA	AUSTR_0011670-RA	AUST_chr_4	AT1G19860.2.Araport11.447	AT1G36990.1.Araport11.447	B	LF
AUST	frag27	AUSTR_0011671-RA	AUSTR_0013181-RA	AUST_chr_4	AT1G01030.1.Araport11.447	AT1G19840.1.Araport11.447	A	LF
AUST	frag28	AUSTR_0032177-RA	AUSTR_0032734-RA	AUST_chr_5	AT4G00090.1.Araport11.447	AT4G05450.1.Araport11.447	O	LF
AUST	frag29	AUSTR_0032798-RA	AUSTR_0033260-RA	AUST_chr_5	AT4G08350.1.Araport11.447	AT4G12540.1.Araport11.447	P	LF
AUST	frag30	AUSTR_0033490-RA	AUSTR_0034747-RA	AUST_chr_5	AT5G50175.1.Araport11.447	AT5G60800.2.Araport11.447	Wb	LF
AUST	frag31	AUSTR_0034748-RA	AUSTR_0036410-RA	AUST_chr_5	AT5G01040.1.Araport11.447	AT5G22950.1.Araport11.447	R	LF
AUST	frag32	AUSTR_0000001-RA	AUSTR_0001495-RA	AUST_chr_6	AT2G31081.1.Araport11.447	AT2G47980.1.Araport11.447	J	MF
AUST	frag33	AUSTR_0001513-RA	AUSTR_0001925-RA	AUST_chr_6	AT2G27360.1.Araport11.447	AT2G31020.1.Araport11.447	I #3	MF
AUST	frag34	AUSTR_0002115-RA	AUSTR_0002723-RA	AUST_chr_6	AT2G27140.1.Araport11.447	AT2G31010.2.Araport11.447	I #2	LF
AUST	frag35	AUSTR_0002724-RA	AUSTR_0004606-RA	AUST_chr_6	AT2G31060.3.Araport11.447	AT2G48150.1.Araport11.447	J	LF
AUST	frag36	AUSTR_0004608-RA	AUSTR_0004953-RA	AUST_chr_6	AT4G00026.1.Araport11.447	AT4G05420.1.Araport11.447	O	MF
AUST	frag37	AUSTR_0004954-RA	AUSTR_0005228-RA	AUST_chr_6	AT4G07390.2.Araport11.447	AT4G12610.2.Araport11.447	P	MF
AUST	frag38	AUSTR_0005234-RA	AUSTR_0005993-RA	AUST_chr_6	AT5G49630.1.Araport11.447	AT5G60800.2.Araport11.447	Wb	MF
AUST	frag39	AUSTR_0005994-RA	AUSTR_0007092-RA	AUST_chr_6	AT5G01030.2.Araport11.447	AT5G22960.1.Araport11.447	R	MF
AUST	frag40	AUSTR_0018705-RA	AUSTR_0019776-RA	AUST_chr_7	AT1G65220.1.Araport11.447	AT1G80950.1.Araport11.447	E	MF
AUST	frag41	AUSTR_0019795-RA	AUSTR_0020351-RA	AUST_chr_7	AT1G56210.1.Araport11.447	AT1G64670.2.Araport11.447	D	MF
AUST	frag42	AUSTR_0018534-RA	AUSTR_0020471-RA	AUST_chr_7	AT1G45000.1.Araport11.447	AT1G55020.1.Araport11.447	C	MF
AUST	frag43	AUSTR_0020804-RA	AUSTR_0022098-RA	AUST_chr_7	AT1G19850.1.Araport11.447	AT1G35670.1.Araport11.447	B	MF
AUST	frag44	AUSTR_0022101-RA	AUSTR_0023186-RA	AUST_chr_7	AT1G01020.1.Araport11.447	AT1G19840.1.Araport11.447	A	MF
AUST	frag45	AUSTR_0023238-RA	AUSTR_0023420-RA	AUST_chr_8	AT2G01060.1.Araport11.447	AT2G02520.1.Araport11.447	KL #1	MF
AUST	frag46	AUSTR_0023409-RA	AUSTR_0023810-RA	AUST_chr_8	AT3G25720.1.Araport11.447	AT3G29400.1.Araport11.447	KL #2	MF
AUST	frag47	AUSTR_0023811-RA	AUSTR_0024485-RA	AUST_chr_8	AT2G15480.2.Araport11.447	AT2G20515.1.Araport11.447	H	LF
AUST	frag48	AUSTR_0024618-RA	AUSTR_0024749-RA	AUST_chr_8	AT2G05320.1.Araport11.447	AT2G07020.1.Araport11.447	G	LF
AUST	frag49	AUSTR_0024905-RA	AUSTR_0027793-RA	AUST_chr_8	AT3G01040.2.Araport11.447	AT3G25505.1.Araport11.447	F	LF
AUST	frag50	AUSTR_0013188-RA	AUSTR_0014572-RA	AUST_chr_9	AT3G01015.1.Araport11.447	AT3G19660.1.Araport11.447	F #2	MF
AUST	frag51	AUSTR_0014605-RA	AUSTR_0015510-RA	AUST_chr_9	AT3G42880.1.Araport11.447	AT3G52610.1.Araport11.447	MN #2	LF
AUST	frag52	AUSTR_0015546-RA	AUSTR_0016712-RA	AUST_chr_9	AT1G43630.1.Araport11.447	AT1G56190.1.Araport11.447	C	LF
AUST	frag53	AUSTR_0016729-RA	AUSTR_0018533-RA	AUST_chr_9	AT3G42180.1.Araport11.447	AT3G63460.1.Araport11.447	MN	MF
PREA	frag1	PREAL_0018026-RA	PREAL_0019951-RA	PREA_chr_1	AT4G16260.1.Araport11.447	AT4G40070.1.Araport11.447	U	MF
PREA	frag2	PREAL_0019961-RA	PREAL_0020169-RA	PREA_chr_1	AT4G13990.1.Araport11.447	AT4G16150.1.Araport11.447	T	MF
PREA	frag3	PREAL_0020741-RA	PREAL_0020949-RA	PREA_chr_1	AT5G37490.1.Araport11.447	AT5G39970.1.Araport11.447	S	MF
PREA	frag4	PREAL_0020951-RA	PREAL_0021623-RA	PREA_chr_1	AT5G42130.1.Araport11.447	AT5G47800.2.Araport11.447	V	MF
PREA	frag5	PREAL_0021595-RA	PREAL_0022094-RA	PREA_chr_1	AT5G60810.1.Araport11.447	AT5G67360.1.Araport11.447	X	MF
PREA	frag6	PREAL_0021975-RA	PREAL_0022528-RA	PREA_chr_1	AT5G23010.2.Araport11.447	AT5G30510.1.Araport11.447	Q	MF
PREA	frag7	PREAL_0022529-RA	PREAL_0022632-RA	PREA_chr_1	AT5G47820.1.Araport11.447	AT5G49580.3.Araport11.447	Wa	MF
PREA	frag8	PREAL_0028236-RA	PREAL_0028272-RA	PREA_chr_2	AT4G12870.1.Araport11.447	AT4G13350.1.Araport11.447	T	LF
PREA	frag9	PREAL_0028684-RA	PREAL_0028942-RA	PREA_chr_2	AT5G37200.1.Araport11.447	AT5G40320.1.Araport11.447	S	LF
PREA	frag10	PREAL_0028947-RA	PREAL_0029529-RA	PREA_chr_2	AT5G42330.1.Araport11.447	AT5G47730.4.Araport11.447	V	LF
PREA	frag11	PREAL_0029687-RA	PREAL_0029785-RA	PREA_chr_2	AT4G15080.1.Araport11.447	AT4G16190.1.Araport11.447	T	LF
PREA	frag12	PREAL_0029786-RA	PREAL_0031916-RA	PREA_chr_2	AT4G16250.1.Araport11.447	AT4G40090.1.Araport11.447	U	LF
PREA	frag13	PREAL_0031962-RA	PREAL_0032618-RA	PREA_chr_3	AT2G21810.1.Araport11.447	AT2G25100.1.Araport11.447	I #2	MF
PREA	frag14	PREAL_0032987-RA	PREAL_0033232-RA	PREA_chr_3	AT2G26730.1.Araport11.447	AT2G28230.1.Araport11.447	I #1	MF
PREA	frag15	PREAL_0033247-RA	PREAL_0033741-RA	PREA_chr_3	AT1G59740.1.Araport11.447	AT1G64625.1.Araport11.447	D	LF
PREA	frag16	PREAL_0033751-RA	PREAL_0035332-RA	PREA_chr_3	AT1G64970.1.Araport11.447	AT1G80950.1.Araport11.447	E	LF
PREA	frag17	PREAL_0035337-RA	PREAL_0035903-RA	PREA_chr_3	AT2G20920.1.Araport11.447	AT2G27190.1.Araport11.447	I #1	LF
PREA	frag18	PREAL_0035906-RA	PREAL_0036179-RA	PREA_chr_3	AT3G25540.1.Araport11.447	AT3G32940.1.Araport11.447	KL #2	LF
PREA	frag19	PREAL_0036172-RA	PREAL_0036310-RA	PREA_chr_3	AT2G01818.1.Araport11.447	AT2G04038.1.Araport11.447	KL #1	LF
PREA	frag20	PREAL_0007086-RA	PREAL_0007216-RA	PREA_chr_4	AT5G47860.1.Araport11.447	AT5G49620.2.Araport11.447	Wa	LF
PREA	frag21	PREAL_0007217-RA	PREAL_0007904-RA	PREA_chr_4	AT5G23010.2.Araport11.447	AT5G30490.1.Araport11.447	Q	LF
PREA	frag22	PREAL_0007838-RA	PREAL_0008326-RA	PREA_chr_4	AT5G60830.1.Araport11.447	AT5G64810.1.Araport11.447	X	LF
PREA	frag23	PREAL_0008881-RA	PREAL_0008946-RA	PREA_chr_4	AT2G05335.1.Araport11.447	AT2G05990.2.Araport11.447	G	MF
PREA	frag24	PREAL_0009037-RA	PREAL_0009660-RA	PREA_chr_4	AT3G19710.1.Araport11.447	AT3G25520.3.Araport11.447	F #1	MF
PREA	frag25	PREAL_0009668-RA	PREAL_0010575-RA	PREA_chr_4	AT3G52660.3.Araport11.447	AT3G63530.2.Araport11.447	MN #1	LF
PREA	frag26	PREAL_0010590-RA	PREAL_0011578-RA	PREA_chr_4	AT1G19850.1.Araport11.447	AT1G36990.1.Araport11.447	B	LF
PREA	frag27	PREAL_0011570-RA	PREAL_0013174-RA	PREA_chr_4	AT1G01040.2.Araport11.447	AT1G19840.1.Araport11.447	A	LF
PREA	frag28	PREAL_0040711-RA	PREAL_0040826-RA	PREA_chr_5	AT4G03153.1.Araport11.447	AT4G05450.1.Araport11.447	O	LF
PREA	frag29	PREAL_0040952-RA	PREAL_0041428-RA	PREA_chr_5	AT4G08320.2.Araport11.447	AT4G12580.1.Araport11.447	P	LF
PREA	frag30	PREAL_0041598-RA	PREAL_0042892-RA	PREA_chr_5	AT5G50210.1.Araport11.447	AT5G60800.2.Araport11.447	Wb	LF
PREA	frag31	PREAL_0042893-RA	PREAL_0044703-RA	PREA_chr_5	AT5G01100.1.Araport11.447	AT5G23000.1.Araport11.447	R	LF
PREA	frag32	PREAL_0000001-RA	PREAL_0001356-RA	PREA_chr_6	AT2G31082.1.Araport11.447	AT2G47320.1.Araport11.447	J	MF
PREA	frag33	PREAL_0001363-RA	PREAL_0001639-RA	PREA_chr_6	AT2G28410.1.Araport11.447	AT2G31020.1.Araport11.447	I #3	MF
PREA	frag34	PREAL_0002044-RA	PREAL_0002528-RA	PREA_chr_6	AT2G27050.1.Araport11.447	AT2G31010.2.Araport11.447	I #2	LF
PREA	frag35	PREAL_0002529-RA	PREAL_0004313-RA	PREA_chr_6	AT2G31060.3.Araport11.447	AT2G48140.1.Araport11.447	J	LF
PREA	frag36	PREAL_0004315-RB	PREAL_0004563-RA	PREA_chr_6	AT4G00026.1.Araport11.447	AT4G03230.4.Araport11.447	O	MF
PREA	frag37	PREAL_0004565-RA	PREAL_0004741-RA	PREA_chr_6	AT4G07390.2.Araport11.447	AT4G11540.1.Araport11.447	P	MF
PREA	frag38	PREAL_0004747-RA	PREAL_0005582-RA	PREA_chr_6	AT5G49630.1.Araport11.447	AT5G60800.2.Araport11.447	Wb	MF
PREA	frag39	PREAL_0005583-RA	PREAL_0006797-RA	PREA_chr_6	AT5G01030.2.Araport11.447	AT5G22960.1.Araport11.447	R	MF
PREA	frag40	PREAL_0013428-RA	PREAL_0014503-RA	PREA_chr_7	AT1G65220.1.Araport11.447	AT1G80950.1.Araport11.447	E	MF
PREA	frag41	PREAL_0014514-RA	PREAL_0015038-RA	PREA_chr_7	AT1G56280.2.Araport11.447	AT1G64670.2.Araport11.447	D	MF
PREA	frag42	PREAL_0013179-RA	PREAL_0015179-RA	PREA_chr_7	AT1G45000.1.Araport11.447	AT1G54960.1.Araport11.447	C	MF
PREA	frag43	PREAL_0015615-RA	PREAL_0016838-RA	PREA_chr_7	AT1G19860.2.Araport11.447	AT1G34320.1.Araport11.447	B	MF
PREA	frag44	PREAL_0016839-RA	PREAL_0018025-RA	PREA_chr_7	AT1G01020.1.Araport11.447	AT1G19840.1.Araport11.447	A	MF
PREA	frag45	PREAL_0036347-RA	PREAL_0036555-RA	PREA_chr_8	AT2G01850.1.Araport11.447	AT2G03810.7.Araport11.447	KL #1	MF
PREA	frag46	PREAL_0036571-RA	PREAL_0037038-RA	PREA_chr_8	AT3G25540.1.Araport11.447	AT3G30290.1.Araport11.447	KL #2	MF
PREA	frag47	PREAL_0037051-RA	PREAL_0037686-RA	PREA_chr_8	AT2G14755.1.Araport11.447	AT2G20890.1.Araport11.447	H	LF
PREA	frag48	PREAL_0038043-RA	PREAL_0038096-RA	PREA_chr_8	AT2G05590.2.Araport11.447	AT2G06040.1.Araport11.447	G	LF
PREA	frag49	PREAL_0038270-RA	PREAL_0040703-RA	PREA_chr_8	AT3G01040.2.Araport11.447	AT3G25520.3.Araport11.447	F	LF
PREA	frag50	PREAL_0022938-RA	PREAL_0024168-RA	PREA_chr_9	AT3G01015.1.Araport11.447	AT3G19710.1.Araport11.447	F #2	MF
PREA	frag51	PREAL_0024169-RA	PREAL_0025059-RA	PREA_chr_9	AT3G43980.1.Araport11.447	AT3G52620.1.Araport11.447	MN #2	LF
PREA	frag52	PREAL_0025315-RA	PREAL_0026198-RA	PREA_chr_9	AT1G48000.1.Araport11.447	AT1G56190.1.Araport11.447	C	LF
PREA	frag53	PREAL_0026208-RA	PREAL_0027449-RA	PREA_chr_9	AT3G42180.1.Araport11.447	AT3G63460.1.Araport11.447	MN	MF
FRUT	frag1	FRUTE_0010664-RA	FRUTE_0012166-RA	FRUT_chr_1	AT4G16780.1.Araport11.447	AT4G40070.1.Araport11.447	U	MF
FRUT	frag2	FRUTE_0012293-RA	FRUTE_0012721-RA	FRUT_chr_1	AT1G60060.1.Araport11.447	AT1G64670.2.Araport11.447	D	LF
FRUT	frag3	FRUTE_0012720-RA	FRUTE_0012921-RA	FRUT_chr_1	AT2G26760.1.Araport11.447	AT2G28210.1.Araport11.447	I #1	MF
FRUT	frag4	FRUTE_0013163-RA	FRUTE_0013553-RA	FRUT_chr_1	AT5G36228.1.Araport11.447	AT5G39990.1.Araport11.447	S	MF
FRUT	frag5	FRUTE_0013554-RA	FRUTE_0014047-RA	FRUT_chr_1	AT5G42130.1.Araport11.447	AT5G47800.2.Araport11.447	V	MF
FRUT	frag6	FRUTE_0014049-RA	FRUTE_0015136-RA	FRUT_chr_1	AT5G60810.1.Araport11.447	AT5G67630.1.Araport11.447	X	MF
FRUT	frag7	FRUTE_0014576-RA	FRUTE_0014919-RA	FRUT_chr_1	AT5G23010.2.Araport11.447	AT5G30510.1.Araport11.447	Q	MF
FRUT	frag8	FRUTE_0014921-RA	FRUTE_0015033-RA	FRUT_chr_1	AT5G47820.1.Araport11.447	AT5G49580.3.Araport11.447	Wa	MF
FRUT	frag9	FRUTE_0035465-RA	FRUTE_0036188-RA	FRUT_chr_2	AT2G15350.1.Araport11.447	AT2G20900.1.Araport11.447	H	MF
FRUT	frag10	FRUTE_0036484-RA	FRUTE_0036740-RA	FRUT_chr_2	AT5G37020.1.Araport11.447	AT5G40320.1.Araport11.447	S	LF
FRUT	frag11	FRUTE_0036750-RA	FRUTE_0037328-RA	FRUT_chr_2	AT5G42140.1.Araport11.447	AT5G47800.2.Araport11.447	V	LF
FRUT	frag12	FRUTE_0037482-RA	FRUTE_0037573-RA	FRUT_chr_2	AT4G15080.1.Araport11.447	AT4G16190.1.Araport11.447	T	LF
FRUT	frag13	FRUTE_0037574-RA	FRUTE_0039343-RA	FRUT_chr_2	AT4G16250.1.Araport11.447	AT4G40060.1.Araport11.447	U	LF
FRUT	frag14	FRUTE_0023512-RA	FRUTE_0023949-RA	FRUT_chr_3	AT2G21160.1.Araport11.447	AT2G24710.3.Araport11.447	I #2	MF
FRUT	frag15	FRUTE_0024421-RA	FRUTE_0025226-RA	FRUT_chr_3	AT3G52750.1.Araport11.447	AT3G63530.2.Araport11.447	MN #1	LF
FRUT	frag16	FRUTE_0025232-RA	FRUTE_0026178-RA	FRUT_chr_3	AT1G19850.1.Araport11.447	AT1G36990.1.Araport11.447	B	LF
FRUT	frag17	FRUTE_0026179-RA	FRUTE_0027408-RA	FRUT_chr_3	AT1G01030.1.Araport11.447	AT1G19840.1.Araport11.447	A	LF
FRUT	frag18	FRUTE_0006266-RA	FRUTE_0006397-RA	FRUT_chr_4	AT5G47860.1.Araport11.447	AT5G49620.2.Araport11.447	Wa	LF
FRUT	frag19	FRUTE_0006398-RA	FRUTE_0006914-RA	FRUT_chr_4	AT5G23010.2.Araport11.447	AT5G30490.1.Araport11.447	Q	LF
FRUT	frag20	FRUTE_0006165-RA	FRUTE_0007323-RA	FRUT_chr_4	AT5G60890.1.Araport11.447	AT5G67150.1.Araport11.447	X	LF
FRUT	frag21	FRUTE_0007665-RA	FRUTE_0007845-RA	FRUT_chr_4	AT2G05170.1.Araport11.447	AT2G06105.1.Araport11.447	G	MF
FRUT	frag22	FRUTE_0007897-RA	FRUTE_0008386-RA	FRUT_chr_4	AT3G19710.1.Araport11.447	AT3G25520.3.Araport11.447	F #1	MF
FRUT	frag23	FRUTE_0008411-RA	FRUTE_0008621-RA	FRUT_chr_4	AT4G14320.2.Araport11.447	AT4G16220.1.Araport11.447	T	MF
FRUT	frag24	FRUTE_0008696-RA	FRUTE_0009884-RA	FRUT_chr_4	AT1G64970.1.Araport11.447	AT1G79420.1.Araport11.447	E	LF
FRUT	frag25	FRUTE_0009888-RA	FRUTE_0010291-RA	FRUT_chr_4	AT2G20920.1.Araport11.447	AT2G27190.1.Araport11.447	I #1	LF
FRUT	frag26	FRUTE_0010305-RA	FRUTE_0010547-RA	FRUT_chr_4	AT3G25540.1.Araport11.447	AT3G32940.1.Araport11.447	KL #2	LF
FRUT	frag27	FRUTE_0010548-RA	FRUTE_0010663-RA	FRUT_chr_4	AT2G01100.2.Araport11.447	AT2G04038.1.Araport11.447	KL #1	LF
FRUT	frag28	FRUTE_0027416-RA	FRUTE_0027982-RA	FRUT_chr_5	AT4G00060.3.Araport11.447	AT4G05450.1.Araport11.447	O	LF
FRUT	frag29	FRUTE_0028094-RA	FRUTE_0028634-RA	FRUT_chr_5	AT4G08150.1.Araport11.447	AT4G12540.1.Araport11.447	P	LF
FRUT	frag30	FRUTE_0028765-RA	FRUTE_0029866-RA	FRUT_chr_5	AT5G50175.1.Araport11.447	AT5G60800.2.Araport11.447	Wb	LF
FRUT	frag31	FRUTE_0029867-RA	FRUTE_0031472-RA	FRUT_chr_5	AT5G01040.1.Araport11.447	AT5G22950.1.Araport11.447	R	LF
FRUT	frag32	FRUTE_0000001-RB	FRUTE_0001229-RA	FRUT_chr_6	AT2G31070.1.Araport11.447	AT2G48030.1.Araport11.447	J	MF
FRUT	frag33	FRUTE_0001231-RA	FRUTE_0001454-RA	FRUT_chr_6	AT2G28550.3.Araport11.447	AT2G31020.1.Araport11.447	I #3	MF
FRUT	frag34	FRUTE_0001665-RA	FRUTE_0002160-RA	FRUT_chr_6	AT2G27140.1.Araport11.447	AT2G31010.2.Araport11.447	I #2	LF
FRUT	frag35	FRUTE_0002162-RA	FRUTE_0003770-RA	FRUT_chr_6	AT2G31060.3.Araport11.447	AT2G48150.1.Araport11.447	J	LF
FRUT	frag36	FRUTE_0003773-RA	FRUTE_0004112-RA	FRUT_chr_6	AT4G00026.1.Araport11.447	AT4G05390.1.Araport11.447	O	MF
FRUT	frag37	FRUTE_0004100-RA	FRUTE_0004331-RA	FRUT_chr_6	AT4G07390.2.Araport11.447	AT4G12620.1.Araport11.447	P	MF
FRUT	frag38	FRUTE_0004337-RA	FRUTE_0005002-RA	FRUT_chr_6	AT5G49630.1.Araport11.447	AT5G60800.2.Araport11.447	Wb	MF
FRUT	frag39	FRUTE_0005003-RA	FRUTE_0006047-RA	FRUT_chr_6	AT5G02030.1.Araport11.447	AT5G22960.1.Araport11.447	R	MF
FRUT	frag40	FRUTE_0019380-RA	FRUTE_0019563-RA	FRUT_chr_7	AT1G43700.1.Araport11.447	AT1G55380.1.Araport11.447	C	MF
FRUT	frag41	FRUTE_0019564-RA	FRUTE_0020563-RA	FRUT_chr_7	AT1G65220.1.Araport11.447	AT1G80950.1.Araport11.447	E	MF
FRUT	frag42	FRUTE_0020564-RA	FRUTE_0021078-RA	FRUT_chr_7	AT1G56210.1.Araport11.447	AT1G64650.1.Araport11.447	D	MF
FRUT	frag43	FRUTE_0021442-RA	FRUTE_0022506-RA	FRUT_chr_7	AT1G19860.2.Araport11.447	AT1G34470.1.Araport11.447	B	MF
FRUT	frag44	FRUTE_0022507-RA	FRUTE_0023481-RA	FRUT_chr_7	AT1G01020.1.Araport11.447	AT1G19840.1.Araport11.447	A	MF
FRUT	frag45	FRUTE_0031483-RA	FRUTE_0031835-RA	FRUT_chr_8	AT2G01060.1.Araport11.447	AT2G04038.1.Araport11.447	KL #1	MF
FRUT	frag46	FRUTE_0031836-RA	FRUTE_0032353-RA	FRUT_chr_8	AT3G25540.1.Araport11.447	AT3G30340.1.Araport11.447	KL #2	MF
FRUT	frag47	FRUTE_0032358-RA	FRUTE_0033031-RA	FRUT_chr_8	AT2G14820.1.Araport11.447	AT2G20890.1.Araport11.447	H	LF
FRUT	frag48	FRUTE_0033149-RA	FRUTE_0033209-RA	FRUT_chr_8	AT2G05380.3.Araport11.447	AT2G06210.1.Araport11.447	G	LF
FRUT	frag49	FRUTE_0033328-RA	FRUTE_0035456-RA	FRUT_chr_8	AT3G01040.2.Araport11.447	AT3G25493.1.Araport11.447	F	LF
FRUT	frag50	FRUTE_0015227-RA	FRUTE_0016327-RA	FRUT_chr_9	AT3G01015.1.Araport11.447	AT3G19710.1.Araport11.447	F #2	MF
FRUT	frag51	FRUTE_0016328-RA	FRUTE_0016937-RA	FRUT_chr_9	AT3G45460.1.Araport11.447	AT3G52610.1.Araport11.447	MN #2	LF
FRUT	frag52	FRUTE_0017073-RA	FRUTE_0018070-RA	FRUT_chr_9	AT1G43710.1.Araport11.447	AT1G56190.1.Araport11.447	C	LF
FRUT	frag53	FRUTE_0018084-RA	FRUTE_0019379-RA	FRUT_chr_9	AT3G42180.1.Araport11.447	AT3G63460.1.Araport11.447	MN	MF
AURI	frag1	AURI01000000	AURI01001347	AURI_chr_1	AT2G31060.3.Araport11.447	AT2G48150.1.Araport11.447	J	LF
AURI	frag2	AURI01001349	AURI01001627	AURI_chr_1	AT2G27080.1.Araport11.447	AT2G30990.1.Araport11.447	I #2	LF
AURI	frag3	AURI01001628	AURI01001921	AURI_chr_1	AT2G12400.1.Araport11.447	AT2G19090.1.Araport11.447	H	LF
AURI	frag4	AURI01001932	AURI01002427	AURI_chr_1	AT1G56330.1.Araport11.447	AT1G64600.1.Araport11.447	D	LF
AURI	frag5	AURI01002421	AURI01003636	AURI_chr_1	AT1G66810.1.Araport11.447	AT1G80950.1.Araport11.447	E	LF
AURI	frag6	AURI01003637	AURI01003749	AURI_chr_1	AT2G01100.2.Araport11.447	AT2G04030.1.Araport11.447	KL #1	LF
AURI	frag7	AURI01003750	AURI01003953	AURI_chr_1	AT3G25540.1.Araport11.447	AT3G32940.1.Araport11.447	KL #2	LF
AURI	frag8	AURI01003960	AURI01004276	AURI_chr_1	AT2G20920.1.Araport11.447	AT2G26600.1.Araport11.447	I #1	LF
AURI	frag9	AURI02000001	AURI02000815	AURI_chr_2	AT1G01030.1.Araport11.447	AT1G19840.1.Araport11.447	A	MF
AURI	frag10	AURI02000816	AURI02001830	AURI_chr_2	AT1G19850.1.Araport11.447	AT1G34220.1.Araport11.447	B	MF
AURI	frag11	AURI02001831	AURI02002620	AURI_chr_2	AT5G49630.1.Araport11.447	AT5G60800.2.Araport11.447	Wb	MF
AURI	frag12	AURI02002621	AURI02003614	AURI_chr_2	AT5G01010.2.Araport11.447	AT5G23000.1.Araport11.447	R	MF
AURI	frag13	AURI02003616	AURI02003878	AURI_chr_2	AT4G00026.1.Araport11.447	AT4G05420.1.Araport11.447	O	MF
AURI	frag14	AURI02003879	AURI02004108	AURI_chr_2	AT4G07390.2.Araport11.447	AT4G12620.1.Araport11.447	P	MF
AURI	frag15	AURI02004235	AURI02004548	AURI_chr_2	AT1G56210.1.Araport11.447	AT1G64670.2.Araport11.447	D	MF
AURI	frag16	AURI02004551	AURI02005274	AURI_chr_2	AT1G65380.1.Araport11.447	AT1G80950.1.Araport11.447	E	MF
AURI	frag17	AURI02005275	AURI02005428	AURI_chr_2	AT1G45000.1.Araport11.447	AT1G54270.1.Araport11.447	C	MF
AURI	frag18	AURI03000067	AURI03000165	AURI_chr_3	AT5G47820.1.Araport11.447	AT5G49580.3.Araport11.447	Wa	MF
AURI	frag19	AURI03000166	AURI03000421	AURI_chr_3	AT5G23010.2.Araport11.447	AT5G30510.1.Araport11.447	Q	MF
AURI	frag20	AURI03000417	AURI03000931	AURI_chr_3	AT5G60820.1.Araport11.447	AT5G65925.1.Araport11.447	X	MF
AURI	frag21	AURI03000941	AURI03001336	AURI_chr_3	AT5G42380.1.Araport11.447	AT5G47800.2.Araport11.447	V	MF
AURI	frag22	AURI03001335	AURI03001587	AURI_chr_3	AT5G33370.1.Araport11.447	AT5G39990.1.Araport11.447	S	MF
AURI	frag23	AURI03001689	AURI03001940	AURI_chr_3	AT4G13400.1.Araport11.447	AT4G16220.1.Araport11.447	T	MF
AURI	frag24	AURI03001945	AURI03003533	AURI_chr_3	AT4G16260.1.Araport11.447	AT4G36060.3.Araport11.447	U	MF
AURI	frag25	AURI04000001	AURI04000239	AURI_chr_4	AT4G00050.1.Araport11.447	AT4G05450.1.Araport11.447	O	LF
AURI	frag26	AURI04000243	AURI04000331	AURI_chr_4	AT4G11170.1.Araport11.447	AT4G12620.1.Araport11.447	P #1	LF
AURI	frag27	AURI04000332	AURI04000625	AURI_chr_4	AT5G56860.1.Araport11.447	AT5G60790.1.Araport11.447	Wb #1	LF
AURI	frag28	AURI04000624	AURI04001782	AURI_chr_4	AT5G05830.1.Araport11.447	AT5G22940.2.Araport11.447	R #1	LF
AURI	frag29	AURI04001783	AURI04002164	AURI_chr_4	AT3G47500.1.Araport11.447	AT3G53040.1.Araport11.447	MN #2	LF
AURI	frag30	AURI04002190	AURI04003103	AURI_chr_4	AT1G43160.1.Araport11.447	AT1G56190.1.Araport11.447	C	LF
AURI	frag31	AURI04003118	AURI04004156	AURI_chr_4	AT3G42180.1.Araport11.447	AT3G63310.1.Araport11.447	MN	MF
AURI	frag32	AURI05000000	AURI05001228	AURI_chr_5	AT1G01030.1.Araport11.447	AT1G19840.1.Araport11.447	A	LF
AURI	frag33	AURI05001229	AURI05002163	AURI_chr_5	AT1G19870.1.Araport11.447	AT1G36990.1.Araport11.447	B	LF
AURI	frag34	AURI05002168	AURI05002889	AURI_chr_5	AT3G53090.2.Araport11.447	AT3G63530.2.Araport11.447	MN #1	LF
AURI	frag35	AURI05002919	AURI05003207	AURI_chr_5	AT4G08210.1.Araport11.447	AT4G11170.1.Araport11.447	P #2	LF
AURI	frag36	AURI05003205	AURI05004023	AURI_chr_5	AT5G49750.1.Araport11.447	AT5G57015.1.Araport11.447	Wb #2	LF
AURI	frag37	AURI05003849	AURI05004172	AURI_chr_5	AT5G01030.2.Araport11.447	AT5G05810.1.Araport11.447	R #2	LF
AURI	frag38	AURI06000021	AURI06001394	AURI_chr_6	AT3G01060.1.Araport11.447	AT3G25520.3.Araport11.447	F	MF
AURI	frag39	AURI06001452	AURI06001496	AURI_chr_6	AT2G05170.1.Araport11.447	AT2G07170.1.Araport11.447	G	MF
AURI	frag40	AURI06001518	AURI06002013	AURI_chr_6	AT2G11000.1.Araport11.447	AT2G20900.1.Araport11.447	H	MF
AURI	frag41	AURI06002014	AURI06002612	AURI_chr_6	AT2G21160.1.Araport11.447	AT2G30520.1.Araport11.447	I	MF
AURI	frag42	AURI06002604	AURI06003448	AURI_chr_6	AT2G31070.1.Araport11.447	AT2G47980.1.Araport11.447	J	MF
AURI	frag43	AURI07000001	AURI07001862	AURI_chr_7	AT3G01040.2.Araport11.447	AT3G25520.3.Araport11.447	F	LF
AURI	frag44	AURI07002004	AURI07002027	AURI_chr_7	AT2G05630.2.Araport11.447	AT2G07360.2.Araport11.447	G	LF
AURI	frag45	AURI07002032	AURI07002159	AURI_chr_7	AT4G14650.1.Araport11.447	AT4G16160.2.Araport11.447	T #1	LF
AURI	frag46	AURI07002168	AURI07004055	AURI_chr_7	AT4G16250.1.Araport11.447	AT4G40090.1.Araport11.447	U	LF
AURI	frag47	AURI08000150	AURI08000245	AURI_chr_8	AT5G47850.1.Araport11.447	AT5G49620.2.Araport11.447	Wa	LF
AURI	frag48	AURI08000246	AURI08000637	AURI_chr_8	AT5G23010.2.Araport11.447	AT5G30490.1.Araport11.447	Q	LF
AURI	frag49	AURI08000642	AURI08001104	AURI_chr_8	AT5G60830.1.Araport11.447	AT5G67640.1.Araport11.447	X	LF
AURI	frag50	AURI08001125	AURI08001640	AURI_chr_8	AT5G42130.1.Araport11.447	AT5G47800.2.Araport11.447	V	LF
AURI	frag51	AURI08001646	AURI08001909	AURI_chr_8	AT5G32470.1.Araport11.447	AT5G39950.1.Araport11.447	S	LF
AURI	frag52	AURI08001922	AURI08002038	AURI_chr_8	AT4G12740.1.Araport11.447	AT4G14190.1.Araport11.447	T #2	LF
AURI	frag53	AURI08002197	AURI08002407	AURI_chr_8	AT2G01060.1.Araport11.447	AT2G04038.1.Araport11.447	KL #1	MF
AURI	frag54	AURI08002408	AURI08002681	AURI_chr_8	AT3G25540.1.Araport11.447	AT3G30390.2.Araport11.447	KL #2	MF
DIDY	frag1	DIDY01000000	DIDY01000055	DIDY_chr_1	AT2G01860.1.Araport11.447	AT2G04030.1.Araport11.447	KL #1	LF
DIDY	frag2	DIDY01000057	DIDY01000249	DIDY_chr_1	AT3G25540.1.Araport11.447	AT3G32940.1.Araport11.447	KL #2	LF
DIDY	frag3	DIDY01000257	DIDY01000507	DIDY_chr_1	AT2G20920.1.Araport11.447	AT2G25280.1.Araport11.447	I #1	LF
DIDY	frag4	DIDY01000506	DIDY01001962	DIDY_chr_1	AT1G64970.1.Araport11.447	AT1G80950.1.Araport11.447	E	LF
DIDY	frag5	DIDY01002018	DIDY01002121	DIDY_chr_1	AT2G11890.1.Araport11.447	AT2G16390.2.Araport11.447	H #1	LF
DIDY	frag6	DIDY01002163	DIDY01002215	DIDY_chr_1	AT2G05790.1.Araport11.447	AT2G07040.1.Araport11.447	G	LF
DIDY	frag7	DIDY01002308	DIDY01003313	DIDY_chr_1	AT3G14300.1.Araport11.447	AT3G25520.3.Araport11.447	F #2	LF
DIDY	frag8	DIDY01003309	DIDY01003636	DIDY_chr_1	AT2G26290.1.Araport11.447	AT2G31010.2.Araport11.447	I #2	MF
DIDY	frag9	DIDY01003638	DIDY01004424	DIDY_chr_1	AT2G31050.1.Araport11.447	AT2G47750.1.Araport11.447	J	MF
DIDY	frag10	DIDY02000000	DIDY02001422	DIDY_chr_2	AT1G01030.1.Araport11.447	AT1G19840.1.Araport11.447	A	LF
DIDY	frag11	DIDY02001423	DIDY02002438	DIDY_chr_2	AT1G19860.2.Araport11.447	AT1G32860.1.Araport11.447	B	LF
DIDY	frag12	DIDY02002443	DIDY02003400	DIDY_chr_2	AT1G43160.1.Araport11.447	AT1G56190.1.Araport11.447	C	LF
DIDY	frag13	DIDY02003415	DIDY02004574	DIDY_chr_2	AT3G42180.1.Araport11.447	AT3G63380.1.Araport11.447	MN	MF
DIDY	frag14	DIDY03000018	DIDY03002091	DIDY_chr_3	AT4G16250.1.Araport11.447	AT4G40090.1.Araport11.447	U	LF
DIDY	frag15	DIDY03002093	DIDY03002262	DIDY_chr_3	AT4G14500.1.Araport11.447	AT4G16210.1.Araport11.447	T	LF
DIDY	frag16	DIDY03002509	DIDY03003999	DIDY_chr_3	AT2G31060.3.Araport11.447	AT2G47990.1.Araport11.447	J	LF
DIDY	frag17	DIDY04000003	DIDY04000131	DIDY_chr_4	AT1G61360.1.Araport11.447	AT1G64670.2.Araport11.447	D	MF
DIDY	frag18	DIDY04000134	DIDY04001020	DIDY_chr_4	AT1G65220.1.Araport11.447	AT1G80950.1.Araport11.447	E	MF
DIDY	frag19	DIDY04001022	DIDY04001518	DIDY_chr_4	AT1G43130.1.Araport11.447	AT1G55050.2.Araport11.447	C	MF
DIDY	frag20	DIDY04001538	DIDY04002454	DIDY_chr_4	AT5G51110.1.Araport11.447	AT5G51400.1.Araport11.447	Wb	LF
DIDY	frag21	DIDY04002455	DIDY04004061	DIDY_chr_4	AT5G01010.2.Araport11.447	AT5G23000.1.Araport11.447	R	LF
DIDY	frag22	DIDY05000079	DIDY05000142	DIDY_chr_5	AT5G48120.1.Araport11.447	AT5G49580.3.Araport11.447	Wa	MF
DIDY	frag23	DIDY05000146	DIDY05000379	DIDY_chr_5	AT5G23010.2.Araport11.447	AT5G30510.1.Araport11.447	Q	MF
DIDY	frag24	DIDY05000383	DIDY05000814	DIDY_chr_5	AT5G60820.1.Araport11.447	AT5G67630.1.Araport11.447	X	MF
DIDY	frag25	DIDY05000813	DIDY05001215	DIDY_chr_5	AT5G42150.1.Araport11.447	AT5G47800.2.Araport11.447	V	MF
DIDY	frag26	DIDY05001214	DIDY05001517	DIDY_chr_5	AT5G35100.1.Araport11.447	AT5G39990.1.Araport11.447	S	MF
DIDY	frag27	DIDY05001532	DIDY05001733	DIDY_chr_5	AT4G13420.1.Araport11.447	AT4G16220.1.Araport11.447	T	MF
DIDY	frag28	DIDY05001736	DIDY05003055	DIDY_chr_5	AT4G16260.1.Araport11.447	AT4G37740.1.Araport11.447	U	MF
DIDY	frag29	DIDY06000000	DIDY06000811	DIDY_chr_6	AT1G01020.1.Araport11.447	AT1G19840.1.Araport11.447	A	MF
DIDY	frag30	DIDY06000812	DIDY06001715	DIDY_chr_6	AT1G19860.2.Araport11.447	AT1G34550.1.Araport11.447	B	MF
DIDY	frag31	DIDY06001892	DIDY06003010	DIDY_chr_6	AT3G46240.1.Araport11.447	AT3G63530.2.Araport11.447	MN	LF
DIDY	frag32	DIDY06003020	DIDY06003196	DIDY_chr_6	AT4G08920.1.Araport11.447	AT4G12620.1.Araport11.447	P	LF
DIDY	frag33	DIDY07000001	DIDY07000201	DIDY_chr_7	AT2G01060.1.Araport11.447	AT2G03780.1.Araport11.447	KL #1	MF
DIDY	frag34	DIDY07000200	DIDY07000578	DIDY_chr_7	AT3G25540.1.Araport11.447	AT3G30180.1.Araport11.447	KL #2	MF
DIDY	frag35	DIDY07000707	DIDY07001212	DIDY_chr_7	AT5G42140.1.Araport11.447	AT5G47210.1.Araport11.447	V	LF
DIDY	frag36	DIDY07001214	DIDY07001779	DIDY_chr_7	AT5G60830.1.Araport11.447	AT5G67640.1.Araport11.447	X	LF
DIDY	frag37	DIDY07001782	DIDY07002172	DIDY_chr_7	AT5G23010.2.Araport11.447	AT5G29000.2.Araport11.447	Q	LF
DIDY	frag38	DIDY07002175	DIDY07002303	DIDY_chr_7	AT5G47860.1.Araport11.447	AT5G49610.1.Araport11.447	Wa	LF
DIDY	frag39	DIDY07002499	DIDY07002770	DIDY_chr_7	AT4G00080.1.Araport11.447	AT4G05420.1.Araport11.447	O	MF
DIDY	frag40	DIDY07002771	DIDY07002983	DIDY_chr_7	AT4G07390.2.Araport11.447	AT4G12620.1.Araport11.447	P	MF
DIDY	frag41	DIDY07002987	DIDY07003613	DIDY_chr_7	AT5G49630.1.Araport11.447	AT5G60800.2.Araport11.447	Wb	MF
DIDY	frag42	DIDY07003614	DIDY07004502	DIDY_chr_7	AT5G01020.1.Araport11.447	AT5G23000.1.Araport11.447	R	MF
DIDY	frag43	DIDY07004503	DIDY07004707	DIDY_chr_7	AT2G17120.1.Araport11.447	AT2G20880.1.Araport11.447	H #2	LF
DIDY	frag44	DIDY08000002	DIDY08001142	DIDY_chr_8	AT3G01015.1.Araport11.447	AT3G25520.3.Araport11.447	F	MF
DIDY	frag45	DIDY08001159	DIDY08001194	DIDY_chr_8	AT2G05170.1.Araport11.447	AT2G07560.1.Araport11.447	G	MF
DIDY	frag46	DIDY08001196	DIDY08001277	DIDY_chr_8	AT2G13560.1.Araport11.447	AT2G16720.1.Araport11.447	H	MF
DIDY	frag47	DIDY08001283	DIDY08001571	DIDY_chr_8	AT4G00026.1.Araport11.447	AT4G05450.1.Araport11.447	O	LF
DIDY	frag48	DIDY08001573	DIDY08002659	DIDY_chr_8	AT3G01040.2.Araport11.447	AT3G14320.1.Araport11.447	F #1	LF
DIDY	frag49	DIDY08002671	DIDY08003023	DIDY_chr_8	AT2G21160.1.Araport11.447	AT2G26560.1.Araport11.447	I #1	MF
DIDY	frag50	DIDY08003340	DIDY08003632	DIDY_chr_8	AT1G60240.1.Araport11.447	AT1G64110.4.Araport11.447	D	LF
DIDY	frag51	DIDY08003642	DIDY08003783	DIDY_chr_8	AT5G36970.1.Araport11.447	AT5G39860.1.Araport11.447	S	LF
DIDY	frag52	DIDY08003836	DIDY08004036	DIDY_chr_8	AT2G26780.1.Araport11.447	AT2G28950.1.Araport11.447	I #2	LF
BAET	frag1	BAET01000005	BAET01001911	BAET_chr_1	AT1G01540.2.Araport11.447	AT1G19840.1.Araport11.447	A	LF
BAET	frag2	BAET01001921	BAET01003613	BAET_chr_1	AT1G19850.1.Araport11.447	AT1G37130.1.Araport11.447	B	LF
BAET	frag3	BAET01003631	BAET01004739	BAET_chr_1	AT1G43020.1.Araport11.447	AT1G56190.1.Araport11.447	C	LF
BAET	frag4	BAET01004506	BAET01006658	BAET_chr_1	AT3G42180.1.Araport11.447	AT3G63520.1.Araport11.447	MN	MF
BAET	frag6	BAET02000000	BAET02000110	BAET_chr_2	AT5G23010.2.Araport11.447	AT5G30510.1.Araport11.447	Wa	MF
BAET	frag5	BAET02000018	BAET02000692	BAET_chr_2	AT5G47820.1.Araport11.447	AT5G49580.3.Araport11.447	Q	MF
BAET	frag7	BAET02000696	BAET02001446	BAET_chr_2	AT5G60820.1.Araport11.447	AT5G67630.1.Araport11.447	X	MF
BAET	frag8	BAET02001445	BAET02002175	BAET_chr_2	AT5G42150.1.Araport11.447	AT5G47800.2.Araport11.447	V	MF
BAET	frag9	BAET02002174	BAET02002455	BAET_chr_2	AT5G33280.1.Araport11.447	AT5G39990.1.Araport11.447	S	MF
BAET	frag10	BAET02002520	BAET02002838	BAET_chr_2	AT4G13400.1.Araport11.447	AT4G16220.1.Araport11.447	T	MF
BAET	frag11	BAET02002837	BAET02003440	BAET_chr_2	AT4G16260.1.Araport11.447	AT4G20310.4.Araport11.447	U #2	MF
BAET	frag12	BAET02003713	BAET02004809	BAET_chr_2	AT2G21160.1.Araport11.447	AT2G31020.1.Araport11.447	I	MF
BAET	frag13	BAET02004808	BAET02006026	BAET_chr_2	AT2G31070.1.Araport11.447	AT2G46900.1.Araport11.447	J	MF
BAET	frag14	BAET03000000	BAET03002264	BAET_chr_3	AT5G01030.2.Araport11.447	AT5G23000.1.Araport11.447	R	LF
BAET	frag15	BAET03002267	BAET03003800	BAET_chr_3	AT5G49665.1.Araport11.447	AT5G60800.2.Araport11.447	Wb	LF
BAET	frag16	BAET03003825	BAET03004306	BAET_chr_3	AT4G07960.1.Araport11.447	AT4G12620.1.Araport11.447	P	LF
BAET	frag17	BAET03004328	BAET03006445	BAET_chr_3	AT3G45860.1.Araport11.447	AT3G62610.1.Araport11.447	MN	LF
BAET	frag18	BAET04000000	BAET04002501	BAET_chr_4	AT2G31070.1.Araport11.447	AT2G48150.1.Araport11.447	J	LF
BAET	frag19	BAET04002504	BAET04002668	BAET_chr_4	AT2G28830.1.Araport11.447	AT2G31010.2.Araport11.447	I #2	LF
BAET	frag20	BAET04002845	BAET04003086	BAET_chr_4	AT4G14500.1.Araport11.447	AT4G16190.1.Araport11.447	T	LF
BAET	frag21	BAET04003087	BAET04006016	BAET_chr_4	AT4G16250.1.Araport11.447	AT4G40090.1.Araport11.447	U	LF
BAET	frag22	BAET05000000	BAET05001643	BAET_chr_5	AT4G20140.1.Araport11.447	AT4G40070.1.Araport11.447	U #1	MF
BAET	frag23	BAET05001946	BAET05002269	BAET_chr_5	AT1G60360.1.Araport11.447	AT1G64110.4.Araport11.447	D	LF
BAET	frag24	BAET05002280	BAET05002505	BAET_chr_5	AT5G35620.3.Araport11.447	AT5G39860.1.Araport11.447	S	LF
BAET	frag25	BAET05002815	BAET05005204	BAET_chr_5	AT1G64970.1.Araport11.447	AT1G80950.1.Araport11.447	E	LF
BAET	frag26	BAET05005205	BAET05005543	BAET_chr_5	AT2G20920.1.Araport11.447	AT2G26570.2.Araport11.447	I #1	LF
BAET	frag27	BAET05005544	BAET05005809	BAET_chr_5	AT2G01670.1.Araport11.447	AT2G04038.1.Araport11.447	KL #1	LF
BAET	frag28	BAET05005618	BAET05005893	BAET_chr_5	AT3G25540.1.Araport11.447	AT3G32940.1.Araport11.447	KL #2	LF
BAET	frag29	BAET06000000	BAET06001217	BAET_chr_6	AT1G01070.1.Araport11.447	AT1G19840.1.Araport11.447	A	MF
BAET	frag30	BAET06001218	BAET06002647	BAET_chr_6	AT1G19850.1.Araport11.447	AT1G35830.1.Araport11.447	B	MF
BAET	frag31	BAET06002914	BAET06003637	BAET_chr_6	AT1G56210.1.Araport11.447	AT1G64670.2.Araport11.447	D	MF
BAET	frag32	BAET06003464	BAET06004926	BAET_chr_6	AT1G65220.1.Araport11.447	AT1G80950.1.Araport11.447	E	MF
BAET	frag33	BAET06004928	BAET06005080	BAET_chr_6	AT1G45130.1.Araport11.447	AT1G53530.1.Araport11.447	C	MF
BAET	frag34	BAET07000000	BAET07000223	BAET_chr_7	AT2G17043.1.Araport11.447	AT2G20875.1.Araport11.447	H #2	LF
BAET	frag35	BAET07000225	BAET07001395	BAET_chr_7	AT5G01030.2.Araport11.447	AT5G22960.1.Araport11.447	R	MF
BAET	frag36	BAET07001398	BAET07002329	BAET_chr_7	AT5G48940.1.Araport11.447	AT5G60800.2.Araport11.447	Wb	MF
BAET	frag37	BAET07002334	BAET07002697	BAET_chr_7	AT4G07390.2.Araport11.447	AT4G12620.1.Araport11.447	P	MF
BAET	frag38	BAET07002701	BAET07003162	BAET_chr_7	AT4G00080.1.Araport11.447	AT4G05420.1.Araport11.447	O	MF
BAET	frag39	BAET07003407	BAET07003660	BAET_chr_7	AT5G47850.1.Araport11.447	AT5G49620.2.Araport11.447	Wa	LF
BAET	frag40	BAET07003662	BAET07004250	BAET_chr_7	AT5G23070.1.Araport11.447	AT5G30510.1.Araport11.447	Q	LF
BAET	frag41	BAET07004288	BAET07005459	BAET_chr_7	AT5G60850.1.Araport11.447	AT5G67640.1.Araport11.447	X	LF
BAET	frag42	BAET07005446	BAET07006047	BAET_chr_7	AT5G42130.1.Araport11.447	AT5G47210.1.Araport11.447	V	LF
BAET	frag43	BAET07006217	BAET07006658	BAET_chr_7	AT3G25540.1.Araport11.447	AT3G30290.1.Araport11.447	KL #2	MF
BAET	frag44	BAET07006661	BAET07007014	BAET_chr_7	AT2G01060.1.Araport11.447	AT2G03750.1.Araport11.447	KL #1	MF
BAET	frag45	BAET08000480	BAET08000532	BAET_chr_8	AT2G15860.2.Araport11.447	AT2G17020.1.Araport11.447	H #1	LF
BAET	frag46	BAET08000545	BAET08000606	BAET_chr_8	AT2G05440.2.Araport11.447	AT2G07560.1.Araport11.447	G	LF
BAET	frag47	BAET08000688	BAET08003607	BAET_chr_8	AT3G01540.4.Araport11.447	AT3G25520.3.Araport11.447	F	LF
BAET	frag48	BAET08003609	BAET08004049	BAET_chr_8	AT4G00026.1.Araport11.447	AT4G05450.1.Araport11.447	O	LF
BAET	frag49	BAET08004125	BAET08004171	BAET_chr_8	AT2G05170.1.Araport11.447	AT2G07560.1.Araport11.447	H	MF
BAET	frag50	BAET08004066	BAET08004330	BAET_chr_8	AT2G13560.1.Araport11.447	AT2G16700.1.Araport11.447	G	MF
BAET	frag51	BAET08004207	BAET08005749	BAET_chr_8	AT3G01015.1.Araport11.447	AT3G25520.3.Araport11.447	F	MF
LYRA	frag1	LYRA01000000	LYRA01000936	LYRA_chr_1	AT2G31070.1.Araport11.447	AT2G48020.2.Araport11.447	J	MF
LYRA	frag2	LYRA01000941	LYRA01001825	LYRA_chr_1	AT2G21160.1.Araport11.447	AT2G31010.2.Araport11.447	I	MF
LYRA	frag3	LYRA01001827	LYRA01002242	LYRA_chr_1	AT2G11520.1.Araport11.447	AT2G20900.1.Araport11.447	H	MF
LYRA	frag4	LYRA01002249	LYRA01003626	LYRA_chr_1	AT3G43630.1.Araport11.447	AT3G63530.2.Araport11.447	MN	LF
LYRA	frag5	LYRA01003657	LYRA01005243	LYRA_chr_1	AT3G01015.1.Araport11.447	AT3G25520.3.Araport11.447	F	MF
LYRA	frag6	LYRA01005282	LYRA01005334	LYRA_chr_1	AT2G05170.1.Araport11.447	AT2G07170.1.Araport11.447	G	MF
LYRA	frag7	LYRA01005505	LYRA01007728	LYRA_chr_1	AT3G01085.3.Araport11.447	AT3G25520.3.Araport11.447	F	LF
LYRA	frag8	LYRA02000123	LYRA02000207	LYRA_chr_2	AT5G47830.1.Araport11.447	AT5G49580.3.Araport11.447	Wa	MF
LYRA	frag9	LYRA02000206	LYRA02000454	LYRA_chr_2	AT5G23010.2.Araport11.447	AT5G30510.1.Araport11.447	Q	MF
LYRA	frag10	LYRA02000455	LYRA02000845	LYRA_chr_2	AT5G60820.1.Araport11.447	AT5G67630.1.Araport11.447	X	MF
LYRA	frag11	LYRA02000843	LYRA02001203	LYRA_chr_2	AT5G42130.1.Araport11.447	AT5G47800.2.Araport11.447	V	MF
LYRA	frag12	LYRA02001202	LYRA02001391	LYRA_chr_2	AT5G33280.1.Araport11.447	AT5G39990.1.Araport11.447	S	MF
LYRA	frag13	LYRA02001393	LYRA02002856	LYRA_chr_2	AT4G16260.1.Araport11.447	AT4G40070.1.Araport11.447	U	MF
LYRA	frag14	LYRA02002863	LYRA02003102	LYRA_chr_2	AT4G12770.1.Araport11.447	AT4G16220.1.Araport11.447	T	MF
LYRA	frag15	LYRA02003107	LYRA02004843	LYRA_chr_2	AT5G01070.1.Araport11.447	AT5G23000.1.Araport11.447	R	LF
LYRA	frag16	LYRA02004845	LYRA02005928	LYRA_chr_2	AT5G49920.1.Araport11.447	AT5G60800.2.Araport11.447	Wb	LF
LYRA	frag17	LYRA02005966	LYRA02006697	LYRA_chr_2	AT1G44110.1.Araport11.447	AT1G56190.1.Araport11.447	C	LF
LYRA	frag18	LYRA02006713	LYRA02007989	LYRA_chr_2	AT3G42180.1.Araport11.447	AT3G63460.1.Araport11.447	MN	MF
LYRA	frag19	LYRA03000002	LYRA03000301	LYRA_chr_3	AT3G25540.1.Araport11.447	AT3G30180.1.Araport11.447	KL #2	MF
LYRA	frag20	LYRA03000303	LYRA03000570	LYRA_chr_3	AT2G01060.1.Araport11.447	AT2G04170.1.Araport11.447	KL #1	MF
LYRA	frag21	LYRA03000803	LYRA03001525	LYRA_chr_3	AT4G30530.1.Araport11.447	AT4G37790.1.Araport11.447	U #2	LF
LYRA	frag22	LYRA03001532	LYRA03002009	LYRA_chr_3	AT5G60830.1.Araport11.447	AT5G65480.1.Araport11.447	X	LF
LYRA	frag23	LYRA03002011	LYRA03002439	LYRA_chr_3	AT5G23010.2.Araport11.447	AT5G30490.1.Araport11.447	Q	LF
LYRA	frag24	LYRA03002440	LYRA03002562	LYRA_chr_3	AT5G47860.1.Araport11.447	AT5G49620.2.Araport11.447	Wa	LF
LYRA	frag25	LYRA03002769	LYRA03003081	LYRA_chr_3	AT4G00090.1.Araport11.447	AT4G05420.1.Araport11.447	O	MF
LYRA	frag26	LYRA03003083	LYRA03003865	LYRA_chr_3	AT4G07390.2.Araport11.447	AT4G12620.1.Araport11.447	P	MF
LYRA	frag27	LYRA03003172	LYRA03004058	LYRA_chr_3	AT5G49730.1.Araport11.447	AT5G60800.2.Araport11.447	Wb	MF
LYRA	frag28	LYRA03004059	LYRA03005042	LYRA_chr_3	AT5G01030.2.Araport11.447	AT5G22960.1.Araport11.447	R	MF
LYRA	frag29	LYRA04000000	LYRA04000894	LYRA_chr_4	AT1G01020.1.Araport11.447	AT1G19840.1.Araport11.447	A	MF
LYRA	frag30	LYRA04000895	LYRA04001753	LYRA_chr_4	AT1G19850.1.Araport11.447	AT1G34790.1.Araport11.447	B	MF
LYRA	frag31	LYRA04001755	LYRA04001869	LYRA_chr_4	AT2G01100.2.Araport11.447	AT2G04038.1.Araport11.447	KL #1	LF
LYRA	frag32	LYRA04001870	LYRA04002142	LYRA_chr_4	AT3G25540.1.Araport11.447	AT3G32940.1.Araport11.447	KL #2	LF
LYRA	frag33	LYRA04002145	LYRA04002569	LYRA_chr_4	AT2G20920.1.Araport11.447	AT2G27190.1.Araport11.447	I #1	LF
LYRA	frag34	LYRA04002571	LYRA04003751	LYRA_chr_4	AT1G64970.1.Araport11.447	AT1G78530.1.Araport11.447	E	LF
LYRA	frag35	LYRA04003753	LYRA04003992	LYRA_chr_4	AT5G35170.1.Araport11.447	AT5G39950.1.Araport11.447	S	LF
LYRA	frag36	LYRA04003998	LYRA04004387	LYRA_chr_4	AT5G43900.3.Araport11.447	AT5G47770.1.Araport11.447	V	LF
LYRA	frag37	LYRA04004790	LYRA04004809	LYRA_chr_4	AT2G05990.2.Araport11.447	AT2G07020.1.Araport11.447	G	LF
LYRA	frag38	LYRA04004924	LYRA04005384	LYRA_chr_4	AT4G08570.1.Araport11.447	AT4G12620.1.Araport11.447	P	LF
LYRA	frag39	LYRA04005108	LYRA04005658	LYRA_chr_4	AT4G00026.1.Araport11.447	AT4G05450.1.Araport11.447	O	LF
LYRA	frag40	LYRA05000003	LYRA05001510	LYRA_chr_5	AT1G01030.1.Araport11.447	AT1G19840.1.Araport11.447	A	LF
LYRA	frag41	LYRA05001514	LYRA05002786	LYRA_chr_5	AT1G19850.1.Araport11.447	AT1G37130.1.Araport11.447	B	LF
LYRA	frag42	LYRA05002799	LYRA05003246	LYRA_chr_5	AT2G10940.1.Araport11.447	AT2G20880.1.Araport11.447	H	LF
LYRA	frag43	LYRA05003272	LYRA05003424	LYRA_chr_5	AT1G43640.1.Araport11.447	AT1G55050.2.Araport11.447	C	MF
LYRA	frag44	LYRA05003425	LYRA05003881	LYRA_chr_5	AT1G56210.1.Araport11.447	AT1G64670.2.Araport11.447	D	MF
LYRA	frag45	LYRA05003884	LYRA05004720	LYRA_chr_5	AT1G67850.1.Araport11.447	AT1G80950.1.Araport11.447	E	MF
LYRA	frag46	LYRA06000081	LYRA06000123	LYRA_chr_6	AT4G14990.1.Araport11.447	AT4G16190.1.Araport11.447	T	LF
LYRA	frag47	LYRA06000124	LYRA06000750	LYRA_chr_6	AT4G16265.2.Araport11.447	AT4G31170.8.Araport11.447	U #1	LF
LYRA	frag48	LYRA06000884	LYRA06000967	LYRA_chr_6	AT1G58180.2.Araport11.447	AT1G63180.1.Araport11.447	D	LF
LYRA	frag49	LYRA06000989	LYRA06001163	LYRA_chr_6	AT2G26600.1.Araport11.447	AT2G30980.1.Araport11.447	I #2	LF
LYRA	frag50	LYRA06001155	LYRA06002002	LYRA_chr_6	AT2G31060.3.Araport11.447	AT2G48150.1.Araport11.447	J	LF

## Sheet: TableS6
Table S6. Annotated elements of each TE superfamily in Biscutella genomes
Class		VARI	AUST	PREA	FRUT	AURI	DIDY	BAET	LYRA
LTR-RTs	Copia	59360007	83946742	60229417	55474501	33452093	73126582	131922208	44723748
		0.0713254	0.0838522	0.0695271	0.0781087	0.0649	0.0849	0.1128	0.0584
	Gypsy	247582997	312524585	271554825	208064408	99567632	244719449	273453571	211583563
		0.297489	0.312172	0.313475	0.292957	0.193	0.2841	0.2338	0.2764
	unknown	108404382	147321254	126710456	87561158	43720918	75722749	107919678	85046380
		0.130256	0.147155	0.146271	0.123287	0.0848	0.0879	0.0923	0.1111
Total length of LTR-RTs		415347386	543792581	458494698	351100067	176740643	393568780	513295457	341353691
% of genome		0.499071	0.54318	0.529273	0.494353	0.3427	0.4569	0.4389	0.4458
Total length of intact LTRs		85681112	83198813	81367853	80506979	23961426	56145412	107413691	82976851
% of LTR-RTs		0.206288	0.152997	0.177467	0.229299	0.135574	0.142657	0.209263	0.243082
TIRs	CACTA	18075995	16526358	17227290	14947596	12482921	38827689	53192549	23911741
		0.0217196	0.0165077	0.0198867	0.0210464	0.0242	0.0451	0.0455	0.0312
	Mutator	23438417	27404415	25679625	16448174	17432149	33163603	33399665	15607713
		0.028163	0.0273735	0.0296438	0.0231592	0.0338	0.0385	0.0286	0.0204
	PIF_Harbinger	6108902	8698120	5332246	4823700	4152467	7897748	13927028	5074102
		0.0073403	0.00868832	0.00615539	0.00679183	0.0081	0.0092	0.0119	0.0066
	Tc1_Mariner	1087971	1232723	1231359	1194493	859776	2809189	1360441	961562
		0.00130728	0.00123133	0.00142145	0.00168186	0.0017	0.0033	0.0012	0.0013
	hAT	5596379	5569983	6532845	5058565	3262371	6665924	8401329	3747455
		0.00672446	0.00556371	0.00754133	0.00712252	0.0063	0.0077	0.0072	0.0049
Total length of TIRs		54307664	59431599	56003365	42472528	38189684	89364153	110281012	49302573
% of genome		0.0652547	0.0593646	0.0646487	0.0598018	0.074	0.1037	0.0943	0.0644
nonTIRs	helitron	102995876	104499725	98768911	100289458	53190403	77506061	140332243	67613440
		0.123757	0.104382	0.114016	0.141209	0.1031	0.09	0.12	0.0883
Total length of TEs		572650926	707723905	613266974	493862053	268120730	560438994	763908712	458269704
% of genome		0.688083	0.706926	0.707938	0.695364	0.519849	0.650636	0.653213	0.598551

## Sheet: TableS7
Table S7. Statistics of tandem repeats in eight Biscutella genomes
	VARI	AUST	PREA	FRUT	AURI	DIDY	BAET	LYRA
Number of tandem repeats	267735	308238	226384	216385	212910	303325	429057	772428
Length of tandem repeats (bp)	27215508	28815381	22476706	21973564	19540011	30227464	41823852	88661459
Number of rDNA	644	790	353	573	453	270	593	11005
Length of rDNA (bp)	139163	172824	58765	74170	431370	131962	154265	7762549
Number of 5S rDNA	573	719	324	554	189	193	518	7161
Length of 5S rDNA (bp)	63215	79332	35580	60781	20687	20999	57080	793257
Number of 35S rDNA	71	71	29	19	264	77	75	3844
Length of 35S rDNA (bp)	75948	93492	23185	13389	410683	110963	97185	6969292

## Sheet: TableS8
Table S8. Tandem repeat types abundant in centromeric and subtelomeric regions
Species	Chromosome	Centromeric	Subtelomeric
VARI	VARI_chr1	213-bp; 234-bp	NA
VARI	VARI_chr2	213-bp; 234-bp	NA
VARI	VARI_chr3	213-bp; 234-bp	NA
VARI	VARI_chr4	NA	NA
VARI	VARI_chr5	213-bp	NA
VARI	VARI_chr6	234-bp	NA
VARI	VARI_chr7	NA	NA
VARI	VARI_chr8	213-bp	NA
VARI	VARI_chr9	NA	NA
AUST	AUST_chr1	NA	NA
AUST	AUST_chr2	NA	NA
AUST	AUST_chr3	234-bp	NA
AUST	AUST_chr4	234-bp	NA
AUST	AUST_chr5	234-bp	NA
AUST	AUST_chr6	NA	NA
AUST	AUST_chr7	NA	NA
AUST	AUST_chr8	NA	NA
AUST	AUST_chr9	NA	NA
PREA	PREA_chr1	213-bp; 234-bp	NA
PREA	PREA_chr2	213-bp; 234-bp	NA
PREA	PREA_chr3	213-bp; 234-bp	NA
PREA	PREA_chr4	213-bp	NA
PREA	PREA_chr5	213-bp; 234-bp	NA
PREA	PREA_chr6	NA	NA
PREA	PREA_chr7	NA	NA
PREA	PREA_chr8	213-bp	NA
PREA	PREA_chr9	213-bp	NA
FRUT	FRUT_chr1	213-bp; 234-bp	NA
FRUT	FRUT_chr2	234-bp	NA
FRUT	FRUT_chr3	213-bp; 234-bp	NA
FRUT	FRUT_chr4	213-bp; 234-bp	NA
FRUT	FRUT_chr5	213-bp; 234-bp	NA
FRUT	FRUT_chr6	NA	NA
FRUT	FRUT_chr7	NA	NA
FRUT	FRUT_chr8	213-bp	NA
FRUT	FRUT_chr9	213-bp; 234-bp	NA
AURI	AURI_chr1	214-bp	78-bp; 79-bp
AURI	AURI_chr2	129-bp/214-bp	78-bp; 79-bp
AURI	AURI_chr3	129-bp; 214-bp	79-bp
AURI	AURI_chr4	214-bp	79-bp
AURI	AURI_chr5	129-bp/214-bp	79-bp
AURI	AURI_chr6	129-bp	79-bp
AURI	AURI_chr7	129-bp/214-bp	78-bp
AURI	AURI_chr8	214-bp	78-bp
DIDY	DIDY_chr1	124-bp	69-bp; 77-bp; 118-bp
DIDY	DIDY_chr2	124-bp; 218-bp	69-bp; 77-bp; 118-bp
DIDY	DIDY_chr3	124-bp; 218-bp	69-bp; 77-bp; 118-bp
DIDY	DIDY_chr4	124-bp; 218-bp	69-bp; 77-bp; 118-bp
DIDY	DIDY_chr5	124-bp	69-bp; 77-bp; 118-bp
DIDY	DIDY_chr6	124-bp	69-bp; 77-bp; 118-bp
DIDY	DIDY_chr7	124-bp; 218-bp	NA
DIDY	DIDY_chr8	124-bp/218-bp	NA
BAET	BAET_chr1	216-bp	69-bp; 77-bp
BAET	BAET_chr2	216-bp	69-bp; 77-bp
BAET	BAET_chr3	216-bp	69-bp; 77-bp
BAET	BAET_chr4	216-bp	69-bp; 77-bp
BAET	BAET_chr5	216-bp	69-bp; 77-bp
BAET	BAET_chr6	216-bp	69-bp; 77-bp
BAET	BAET_chr7	216-bp	69-bp
BAET	BAET_chr8	216-bp	69-bp
LYRA	LYRA_chr1	167-bp	76-bp
LYRA	LYRA_chr2	167-bp	76-bp
LYRA	LYRA_chr3	167-bp; 125-bp	76-bp
LYRA	LYRA_chr4	167-bp; 125-bp	76-bp
LYRA	LYRA_chr5	167-bp	76-bp
LYRA	LYRA_chr6	167-bp; 125-bp	76-bp

## Sheet: TableS9
Table S9. Chromosomal rearrangement rates in Biscutella species
Species	Duration	Node	Elapsed time	Number of CRs	CR rate
AURI	11.84 Mya -- now	A4 -- AURI	12	9	0.75
AURI	11.84 -- 12.08 Mya	A5 -- A4	1	5	5
FRUT	3.30 Mya -- now	A1 -- FRUT	3	3	1
FRUT	3.30 -- 11.84 Mya	A4 -- A1	9	6	0.666667
FRUT	11.84 -- 12.08 Mya	A5 -- A4	1	5	5
AUST, PREA, VARI	3.30 Mya -- now	A1 -- AUST	3	1	0.333333
AUST, PREA, VARI	3.30 -- 11.84 Mya	A4 -- A1	9	6	0.666667
AUST, PREA, VARI	11.84 -- 12.08 Mya	A5 -- A4	1	5	5
BAET	6.65 Mya -- now	A2 -- BAET	7	2	0.285714
BAET	6.65 -- 10.38 Mya	A3 -- A2	4	4	1
BAET	10.38 -- 12.08 Mya	A5 -- A3	2	5	2.5
DIDY	6.65 Mya -- now	A2 -- DIDY	7	6	0.857143
DIDY	6.65 -- 10.38 Mya	A3 -- A2	4	4	1
DIDY	10.38 -- 12.08 Mya	A5 -- A3	2	5	2.5
LYRA	10.38 Mya -- now	A3 -- LYRA	10	14	1.4
LYRA	10.38 -- 12.08 Mya	A5 -- A3	2	5	2.5

## Sheet: TableS10
Table S10. Number of solo- and intact-LTRs in the whole-genome, LF, MF, and pericentromeric regions
Species	Regions	#soloLTR	#intactLTR	S/I ratio (LTR)	Ave LTR-RT age	#soloAthila	#intactAthila	S/I ratio (Athila)	Ave Athila age	#soloCRM	#intactCRM	S/I ratio (CRM)	Ave CRM age	#soloRetand	#intactRetand	S/I ratio (Retand)	Ave Retand age	#soloTekay	#intactTekay	S/I ratio (Tekay)	Ave Tekay age	#soloReina	#intactReina	S/I ratio (Reina)	Ave Reina age	#soloAle	#intactAle	S/I ratio (Ale)	Ave Ale age	#soloSIRE	#intactSIRE	S/I ratio (SIRE)	Ave SIRE age	#soloTork	#intactTork	S/I ratio (Tork)	Ave Tork age	#soloIvana	#intactIvana	S/I ratio (Ivana)	Ave Ivana age	#soloIkeros	#intactIkeros	S/I ratio (Ikeros)	Ave Ikeros age	#soloBianca	#intactBianca	S/I ratio (Bianca)	Ave Bianca age
VARI	whole-genome	4869	11310	0.430504	0.584655	2492	3565	0.699018	0.776228	960	2833	0.338863	0.390163	103	315	0.326984	0.550571	218	271	0.804428	0.738422	26	203	0.128079	0.70242	36	738	0.0487805	0.685	108	282	0.382979	0.685	63	537	0.117318	0.4475	44	387	0.113695	0.583101	31	71	0.43662	0.983717	25	908	0.027533	0.58263
	LF	1613	4292	0.375815	0.61753	821	1244	0.659968	0.805929	246	796	0.309045	0.410749	46	144	0.319444	0.533298	95	122	0.778689	0.798796	12	90	0.133333	0.711575	11	357	0.0308123	0.675451	45	133	0.338346	0.767321	24	253	0.0948617	0.451471	19	189	0.100529	0.645672	13	35	0.371429	0.940143	10	474	0.021097	0.610482
	MF	1372	3920	0.35	0.592678	701	1119	0.626452	0.753367	164	577	0.284229	0.373602	39	160	0.24375	0.518618	88	126	0.698413	0.700071	10	85	0.117647	0.57353	12	350	0.0342857	0.668844	38	136	0.279412	0.598979	27	280	0.0964286	0.441476	20	189	0.10582	0.498531	9	25	0.36	0.933694	14	426	0.0328638	0.548793
	peri-cen	1054	3037	0.347053	0.524631	543	1146	0.473822	0.760776	355	1385	0.256318	0.383138	10	18	0.555556	0.737554	9	21	0.428571	0.626872	0	26	0	0.950973	4	50	0.08	0.511984	7	20	0.35	0.784599	3	19	0.157895	0.584531	3	19	0.157895	0.697221	6	10	0.6	1.2072	1	26	0.0384615	0.635663
AUST	whole-genome	7051	11245	0.627034	0.615668	3600	3617	0.9953	0.904375	1383	2592	0.533565	0.60859	129	272	0.474265	0.682417	165	296	0.557432	1.07597	28	253	0.110672	0.568117	126	814	0.154791	0.675456	109	236	0.461864	0.755365	74	574	0.12892	0.569727	47	348	0.135057	0.608039	25	80	0.3125	0.993447	40	938	0.0426439	0.556826
	LF	1775	4165	0.42617	0.648081	906	1221	0.742015	0.901392	204	682	0.29912	0.220114	46	128	0.359375	0.666335	51	126	0.404762	1.21452	13	122	0.106557	0.506083	43	385	0.111688	0.676405	47	107	0.439252	0.583146	21	258	0.0813953	0.583146	17	154	0.11039	0.623346	12	33	0.363636	1.07885	10	472	0.0211864	0.546736
	MF	1594	3962	0.402322	0.655777	813	1108	0.733755	0.830333	176	531	0.33145	0.647363	53	130	0.407692	0.706173	51	137	0.372263	1.0417	9	105	0.0857143	0.5231	38	394	0.0964467	0.684388	36	114	0.315789	0.658694	37	310	0.119355	0.565379	17	177	0.0960452	0.561071	4	36	0.111111	0.941897	15	483	0.0310559	0.563503
	peri-cen	1392	3265	0.42634	0.529048	762	1290	0.590698	0.942646	387	1378	0.280842	0.856257	3	25	0.12	0.707491	19	37	0.513514	0.900569	0	33	0	0.847072	6	72	0.0833333	0.64052	2	18	0.111111	0.78465	4	29	0.137931	0.507781	1	28	0.0357143	0.741204	2	14	0.142857	0.935444	2	20	0.1	0.419004
PREA	whole-genome	5619	10810	0.519796	0.690828	2351	3111	0.755706	0.951115	1152	3411	0.337731	0.747741	99	193	0.512953	0.752992	153	187	0.818182	1.17922	26	187	0.139037	0.972784	123	675	0.182222	0.704661	60	212	0.283019	0.767398	45	419	0.107399	0.666235	41	317	0.129338	0.675075	21	66	0.318182	1.05339	33	666	0.0495495	0.607238
	LF	1396	2994	0.466266	0.781569	661	839	0.787843	1.05493	160	498	0.321285	0.782264	29	80	0.3625	0.784229	53	54	0.981481	1.05418	12	79	0.151899	0.92586	43	302	0.142384	0.732607	26	81	0.320988	0.782534	21	183	0.114754	0.652581	18	145	0.124138	0.653402	9	20	0.45	1.06886	17	306	0.0555556	0.506999
	MF	1333	2921	0.456351	0.793927	639	759	0.841897	1.07718	123	391	0.314578	0.612005	47	78	0.602564	0.760755	59	80	0.7375	1.02145	9	87	0.103448	0.962213	54	304	0.177632	0.708963	29	111	0.261261	0.746344	15	225	0.0666667	0.650065	17	149	0.114094	0.648213	7	33	0.212121	0.960434	6	335	0.0179104	0.691499
	peri-cen	1995	4612	0.432567	0.579635	734	1416	0.518362	0.812258	621	2345	0.264819	0.74105	13	31	0.419355	0.703463	19	52	0.365385	1.44575	3	19	0.157895	1.00122	7	90	0.0777778	0.625505	2	19	0.105263	0.885631	2	24	0.0833333	0.797348	2	30	0.0666667	0.736529	3	15	0.2	1.03466	5	37	0.135135	0.784222
FRUT	whole-genome	5388	11063	0.487029	0.613975	2327	3152	0.738261	0.889048	1235	2938	0.420354	0.599726	88	206	0.427184	0.671682	111	228	0.486842	0.790098	43	229	0.187773	0.559609	70	747	0.0937082	0.647801	76	221	0.343891	0.68088	77	608	0.126645	0.578195	42	388	0.108247	0.550884	31	77	0.402597	0.848711	26	934	0.0278373	0.711953
	LF	1840	4055	0.453761	0.641425	799	1028	0.777237	0.888295	318	798	0.398496	0.603467	47	88	0.534091	0.65554	54	87	0.62069	0.887458	15	103	0.145631	0.478795	25	344	0.0726744	0.654846	37	105	0.352381	0.69462	36	291	0.123711	0.555792	18	178	0.101124	0.563379	16	31	0.516129	0.908199	12	463	0.0259179	0.717985
	MF	1868	4293	0.435127	0.6255	821	1069	0.768007	0.896864	316	847	0.373081	0.557141	32	103	0.31068	0.676619	48	113	0.424779	0.798483	19	107	0.17757	0.545084	34	383	0.0887728	0.648712	36	104	0.346154	0.633573	39	325	0.12	0.581072	21	208	0.100962	0.52146	13	41	0.317073	0.775399	10	484	0.0206612	0.703591
	peri-cen	1305	2549	0.511965	0.593664	573	1018	0.562868	0.896398	427	1025	0.416585	0.547098	3	10	0.3	0.816394	9	21	0.428571	0.57644	2	20	0.1	0.869665	9	71	0.126761	0.575448	5	14	0.357143	0.962276	3	34	0.0882353	0.49226	3	19	0.157895	0.809208	2	7	0.285714	0.96229	1	32	0.03125	0.817818
AURI	whole-genome	5260	3379	1.55667	0.864827	1978	918	2.15468	1.00975	509	709	0.717913	0.702879	74	45	1.64444	0.9933	55	39	1.41026	0.655058	14	163	0.0858896	0.953812	67	402	0.166667	0.869657	79	209	0.37799	0.811991	55	188	0.292553	0.749641	31	181	0.171271	0.725807	16	22	0.727273	0.982611	6	101	0.0594059	0.879799
	LF	2790	1904	1.46534	0.877159	1043	548	1.90328	0.97134	290	378	0.767196	0.6969	35	29	1.2069	1.03033	26	16	1.625	0.771082	8	82	0.097561	1.03467	40	236	0.169492	0.886329	45	101	0.445545	0.841836	37	109	0.33945	0.844988	21	102	0.205882	0.793751	7	11	0.636364	0.902653	2	54	0.037037	0.958132
	MF	2012	1181	1.70364	0.854256	748	296	2.52703	1.0204	141	219	0.643836	0.761539	34	10	3.4	0.754025	15	12	1.25	0.600139	5	69	0.0724638	0.908878	25	152	0.164474	0.920738	32	95	0.336842	0.770203	19	72	0.263889	0.629447	11	69	0.15942	0.644201	7	10	0.7	0.952987	4	45	0.0888889	0.763165
	peri-cen	476	334	1.42515	0.898127	190	84	2.2619	1.25174	92	130	0.707692	0.676728	1	3	0.333333	1.27304	8	7	1.14286	0.426754	0	10	0	0.959865	0	28	0	0.482035	0	13	0	0.595547	1	6	0.166667	0.915796	0	9	0	0.857148	1	2	0.5	1.26251	0	6	0	0.982231
DIDY	whole-genome	8346	8147	1.02443	0.902226	2240	1081	2.07216	1.18788	3841	3625	1.05959	0.94787	137	81	1.69136	1.44768	95	49	1.93878	0.954956	24	195	0.123077	1.14998	162	1010	0.160396	0.930538	85	251	0.338645	0.955616	66	392	0.168367	0.934331	109	562	0.19395	0.85944	20	56	0.357143	0.98676	17	153	0.111111	1.02558
	LF	4135	4114	1.0051	0.921648	1301	614	2.11889	1.1928	1627	1579	1.0304	1.03971	76	46	1.65217	1.4688	39	17	2.29412	0.765671	12	119	0.10084	1.10216	81	549	0.147541	0.970645	50	151	0.331126	0.95159	32	215	0.148837	0.972845	57	328	0.17378	0.811838	9	32	0.28125	0.884952	10	90	0.111111	0.982296
	MF	2687	2623	1.0244	0.912804	816	390	2.09231	1.1953	994	1017	0.977384	0.964391	58	29	2	1.37526	52	25	2.08	0.884053	9	62	0.145161	1.20925	56	344	0.162791	0.902668	32	88	0.363636	0.940947	30	158	0.189873	0.864485	44	210	0.209524	0.911118	11	19	0.578947	1.15446	6	53	0.113208	1.07336
	peri-cen	951	894	1.06376	0.849932	76	39	1.94872	1.21858	753	659	1.14264	0.720955	1	3	0.333333	2.13959	2	2	1	1.37478	2	10	0.2	1.21751	15	92	0.163043	0.814251	0	1	0	0	3	10	0.3	0.776016	6	12	0.5	0.933766	0	2	0	0.740834	0	6	0	1.3183
BAET	whole-genome	8401	14475	0.58038	0.634368	3006	3834	0.784038	0.580421	2222	3396	0.654299	0.759926	142	131	1.08397	1.04856	136	77	1.76623	0.880857	50	393	0.127226	0.815735	223	2328	0.0957904	0.856519	79	451	0.175166	0.831562	77	664	0.115964	0.76997	96	984	0.097561	0.660376	24	98	0.244898	0.59342	35	398	0.0879397	0.796151
	LF	4807	8015	0.59975	0.664434	1804	2256	0.799645	0.581557	1227	1850	0.663243	0.823507	74	75	0.986667	1.0593	96	41	2.34146	0.939881	33	249	0.13253	0.850439	96	1142	0.084063	0.87513	41	254	0.161417	0.862475	32	373	0.0857909	0.819942	52	544	0.0955882	0.684835	15	53	0.283019	0.635442	15	245	0.0612245	0.823324
	MF	3106	5323	0.583506	0.632873	1159	1534	0.755541	0.525873	667	975	0.684103	0.775452	73	53	1.37736	1.01771	47	32	1.46875	0.790993	22	138	0.15942	0.797972	60	752	0.0797872	0.808249	40	199	0.201005	0.819215	43	299	0.143813	0.715572	43	445	0.0966292	0.643847	10	42	0.238095	0.527489	22	157	0.140127	0.754996
	peri-cen	470	1060	0.443396	0.470939	65	81	0.802469	1.13636	274	472	0.580508	0.512055	1	2	0.5	0	0	3	0	0.423789	0	6	0	0.628665	52	378	0.137566	0.87461	2	2	1	0.279594	2	7	0.285714	0.475674	1	13	0.0769231	0.687105	1	5	0.2	1.10903	1	4	0.25	0.143301
LYRA	whole-genome	5458	10372	0.526224	0.503656	2594	3070	0.844951	0.529486	1078	3565	0.302384	0.345303	68	39	1.74359	1.21679	48	62	0.774194	0.403542	13	177	0.0734463	0.819434	44	710	0.0619718	0.80945	48	258	0.186047	0.683574	26	252	0.103175	0.722262	32	357	0.0896359	0.689552	16	28	0.571429	0.843386	27	418	0.0645933	0.753419
	LF	3169	5749	0.551226	0.546405	1673	1963	0.852267	0.574138	458	1543	0.296824	0.285491	38	30	1.26667	1.09718	28	42	0.666667	0.435868	8	108	0.0740741	0.85566	24	421	0.0570071	0.860433	21	157	0.133758	0.757617	13	143	0.0909091	0.762416	14	205	0.0682927	0.694103	8	21	0.380952	0.83373	15	251	0.059761	0.808289
	MF	1330	2396	0.555092	0.543289	653	736	0.887228	0.464177	155	438	0.353881	0.518783	30	9	3.33333	1.71327	12	11	1.09091	0.290802	6	63	0.0952381	0.773489	11	275	0.04	0.785635	26	101	0.257426	0.589185	13	119	0.109244	0.677312	16	146	0.109589	0.692372	7	6	1.16667	0.98672	11	158	0.0696203	0.627829
	peri-cen	569	1366	0.416545	0.355086	156	216	0.722222	0.447893	287	951	0.301788	0.136995	1	0	NA	NA	0	3	0	0	0	7	0	0.574954	6	14	0.428571	0.307684	1	3	0.333333	0.329289	0	4	0	0.126418	1	6	0.166667	0.391318	1	1	1	NA	1	9	0.111111	1.06694

[truncated: 3 more sheets: TableS11, TableS12, TableS13]
